# Supplementary material
Source: PubMed Central journal article supplement (PMC11072771)

# Multiplexed mRNA analysis of brain-derived extracellular vesicles upon experimental stroke in mice reveals increased mRNA content related to inflammation but also recovery processes

Annika Bub<sup>1\*</sup>, Santra Brenna<sup>1\*</sup>, Malik Alawi<sup>2</sup>, Paul Kügler<sup>1</sup>, Yuqi Gui<sup>1</sup>, Oliver Kretz<sup>3</sup>, Hermann Altmepfen<sup>4</sup>, Tim Magnus<sup>1</sup>, Berta Puig<sup>1‡</sup>

<sup>1</sup> Neurology Department, Experimental Research in Stroke and Inflammation (ERSI). University Medical Center Hamburg-Eppendorf, Hamburg, Germany.

<sup>2</sup> Bioinformatics Core, University Medical Center Hamburg-Eppendorf, Hamburg, Germany.

<sup>3</sup> III Department of Medicine, University Medical Center Hamburg-Eppendorf, Hamburg, Germany.

<sup>4</sup> Institute of Neuropathology, University Medical Center Hamburg-Eppendorf, Hamburg, Germany.

\* shared first authorship

Journal: Cellular and Molecular Life Sciences

Email corresponding author: [b.puig-martorell@uke.de](mailto:b.puig-martorell@uke.de)

## SUPPLEMENTAL TABLES

**Suppl. Table 1.- List of the mRNAs found differentially upregulated ( $\log_2FC \geq 1$ ) in BDEVs of tMCAO compared to shams when mRNA was isolated.** Downregulated mRNAs are already shown in Table 1.

**Suppl. Table 2.- List of the mRNAs found differentially upregulated ( $\log_2FC \geq 1$ ) in BDEVs of tMCAO compared to shams when mRNA was not isolated.** Downregulated mRNAs are already shown in Table 1.

**Suppl. Table 3.- List of the mRNAs found differentially upregulated ( $\log_2FC \geq 1$ ) in BDEVs of tMCAO compared to shams when mRNA was not isolated and BDEVs were not filtered.** Downregulated mRNAs are already shown in Table 1.

## SUPPLEMENTAL FIGURES

**Suppl. Fig. 1.- Heat maps and volcano plots of the up- and downregulated mRNAs with a  $\log_2FC \geq 1$  in all studied conditions.** (A) Heat map of the up- and downregulated mRNAs (absolute  $\log_2FC \geq 1$ ) in BDEVs of tMCAO compared to shams (n=3 mice per group) for the samples where EV preparations were filtered and the RNA was isolated prior to analysis (F+I). (B) Volcano plot for the same mRNAs as in (A) displaying the names of the ten highest significantly differentially expressed mRNAs in BDEVs from tMCAO mice compared to shams. (C) Heat map of the up- and downregulated mRNAs (absolute  $\log_2FC \geq 1$ ) in BDEVs of tMCAO compared to shams (n=3 mice per group) for the samples where EVs underwent a filtration step during preparation but the RNA was not isolated (F+NI). (D) Volcano plot for the same mRNAs as in (C) displaying the names of the ten highest significantly differentially expressed mRNAs in BDEVs from tMCAO mice compared to shams. (E) Heat map of the up- and downregulated mRNAs (absolute  $\log_2FC \geq 1$ ) in BDEVs of tMCAO compared to shams (n=3

mice per group) for the samples without EV filtration and RNA isolation (NF+NI) before analysis. (F) Volcano plot for the same mRNAs as in (E) displaying the names of the ten highest significantly differentially expressed mRNAs in BDEVs from tMCAO mice compared to shams. F = BDEV samples were filtrated during preparation (sBDEVs); NF = BDEVs samples were not filtrated during preparation; I = the mRNA was isolated from BDEVs; NI = the mRNA was not isolated before running the nCounter® panel.

**Suppl. Fig. 2.- Principal component analysis (PCA) score plots show that BDEVs from shams differentially cluster from BDEVs of tMCAO mice in all three panels.** The first two principal components are plotted for each sample. Red circles represent the shams, whereas blue triangles represent tMCAO samples. (A) Panel of filtered EVs and isolated RNA (F+I). (B) Panel of filtered EVs and non-isolated RNA (F+NI). (C) Panel of non-filtered EVs without RNA isolation (NF+NI).

**Suppl. Fig. 3.- Venn diagrams showing commonly shared and unique mRNAs for each studied condition with absolut  $\log_2FC \geq 1$ .** (A) Venn diagrams comparing samples where mRNA was isolated with samples lacking RNA isolation, yet EVs underwent a filtration step in both instances (F+I versus F+NI). (B) Venn diagrams comparing the overlap of altered mRNAs ( $\log_2FC \geq 1$ ) found in all conditions investigated herein. F = BDEV samples were filtrated during preparation (sBDEVs); NF = BDEVs samples were not filtrated during preparation; I = mRNA was isolated from BDEVs; NI = mRNA was not isolated before running the nCounter® panel.

**Suppl. Fig. 4.- No increase in PLP, CNP1, and NCAM in total brain homogenates from tMCAO mice.** (A) Western blots of total brain homogenates from sham and tMCAO samples developed with PLP, CNP1, and NCAM antibodies. TS is total protein staining. (B) Dot plots showing the quantifications for the western blots in (A). n=4 mouse brains per group.

**Suppl. Fig. 5.- Total stainings used for the immunoblot quantifications shown in Fig. 4.** (A) Total staining (TS) for CD40. (B) TS for P2Y12. (C) TS for synapsin, CNP, and PLP. (D) TS for EEAT1 and NCAM. (E) TS for EAAT2. When several antibodies were used for one membrane, the latter was cut according to the molecular weight of the protein of interest, but never stripped and re-incubated.

Suppl. Table 1

| mRNA     | avg sh | avg str | log2FC | Padj     |
|----------|--------|---------|--------|----------|
| Hmox1    | 19.32  | 256.41  | 3.73   | 8.04E-31 |
| Cd44     | 17.83  | 176.82  | 3.30   | 4.10E-09 |
| C1qb     | 35.31  | 318.21  | 3.16   | 1.45E-39 |
| Gfap     | 397.09 | 3440.43 | 3.12   | 5.97E-75 |
| Fcrls    | 9.41   | 75.63   | 3.00   | 1.15E-11 |
| C1qa     | 24.68  | 189.18  | 2.93   | 1.43E-23 |
| C1qc     | 25.76  | 196.33  | 2.93   | 2.91E-28 |
| Cd68     | 28.88  | 215.43  | 2.89   | 4.40E-06 |
| Ncf1     | 22.21  | 165.84  | 2.89   | 2.04E-18 |
| Nes      | 21.19  | 155.21  | 2.87   | 1.51E-23 |
| Ccl12    | 6.17   | 45.32   | 2.86   | 4.18E-07 |
| Il4ra    | 22.17  | 148.71  | 2.74   | 7.72E-18 |
| Ccr5     | 17.14  | 112.90  | 2.72   | 1.64E-15 |
| Tgfb1    | 16.53  | 108.81  | 2.70   | 7.09E-17 |
| Tnc      | 22.50  | 146.39  | 2.70   | 3.20E-18 |
| Tspo     | 9.19   | 56.83   | 2.65   | 8.63E-09 |
| Itga5    | 8.86   | 53.37   | 2.57   | 3.56E-07 |
| Casp8    | 7.59   | 44.62   | 2.54   | 1.57E-06 |
| Cxcl16   | 12.45  | 71.08   | 2.49   | 1.64E-10 |
| Psmb8    | 18.01  | 99.90   | 2.49   | 1.67E-13 |
| Msn      | 17.85  | 99.26   | 2.46   | 2.22E-13 |
| Ccr2     | 11.83  | 60.81   | 2.36   | 5.34E-09 |
| Itgam    | 24.30  | 124.13  | 2.35   | 8.70E-17 |
| Spi1     | 11.97  | 59.62   | 2.33   | 6.50E-09 |
| Tcirg1   | 28.69  | 137.19  | 2.25   | 4.87E-11 |
| Fn1      | 45.10  | 197.11  | 2.14   | 9.06E-17 |
| Osmr     | 10.04  | 43.05   | 2.11   | 3.50E-05 |
| Grn      | 42.20  | 176.64  | 2.08   | 1.02E-13 |
| Stab1    | 12.06  | 50.81   | 2.07   | 5.33E-05 |
| Trem2    | 23.97  | 101.00  | 2.06   | 6.50E-09 |
| Hpgds    | 43.10  | 174.04  | 2.01   | 1.72E-14 |
| Trf      | 289.47 | 1146.01 | 1.98   | 4.29E-26 |
| Lox      | 13.95  | 54.04   | 1.96   | 6.19E-05 |
| Cx3cr1   | 192.01 | 739.88  | 1.94   | 2.37E-24 |
| Cp       | 19.72  | 74.71   | 1.92   | 1.08E-06 |
| Eng      | 16.49  | 61.07   | 1.90   | 3.78E-07 |
| Tnfrsf1a | 25.14  | 92.85   | 1.90   | 7.14E-10 |
| Gusb     | 18.90  | 69.41   | 1.88   | 1.43E-06 |
| Irf8     | 18.80  | 67.70   | 1.84   | 9.74E-07 |
| Stat3    | 65.94  | 233.66  | 1.83   | 4.25E-14 |
| Csf1r    | 94.92  | 334.07  | 1.81   | 6.43E-22 |
| Tnfrsf1b | 29.55  | 104.16  | 1.81   | 6.50E-09 |
| Il1r1    | 32.84  | 112.62  | 1.77   | 1.50E-07 |
| Bcas1    | 120.95 | 410.12  | 1.76   | 0.000299 |
| Il6ra    | 18.10  | 60.08   | 1.73   | 9.75E-06 |
| Hexb     | 138.73 | 462.43  | 1.73   | 1.02E-13 |
| Ccnd1    | 281.07 | 913.97  | 1.70   | 1.42E-16 |
| Tlr2     | 11.79  | 38.04   | 1.69   | 0.000444 |
| Csf1     | 33.73  | 107.91  | 1.68   | 3.77E-07 |
| Hspb1    | 29.29  | 92.60   | 1.66   | 9.15E-06 |
| Spi100   | 14.09  | 43.33   | 1.60   | 0.001033 |
| Stat1    | 40.98  | 122.48  | 1.59   | 1.04E-06 |
| Plcb3    | 21.17  | 63.39   | 1.58   | 2.22E-05 |
| Nfe2l2   | 77.10  | 227.04  | 1.56   | 5.03E-12 |
| Notch1   | 32.72  | 96.02   | 1.55   | 1.20E-06 |
| Col4a1   | 33.49  | 96.99   | 1.54   | 2.90E-06 |
| Cspg4    | 13.37  | 39.04   | 1.53   | 0.002946 |
| Cxcr4    | 10.95  | 31.38   | 1.53   | 0.009501 |
| Tgfbr2   | 40.57  | 115.81  | 1.51   | 3.34E-08 |
| P2rx7    | 27.01  | 77.53   | 1.51   | 0.041231 |
| Cd9      | 27.78  | 78.57   | 1.49   | 2.67E-05 |
| Phf19    | 10.37  | 28.86   | 1.47   | 0.009891 |
| Gjb1     | 62.17  | 167.85  | 1.43   | 4.98E-09 |
| Ltbr     | 27.26  | 72.64   | 1.42   | 1.15E-05 |
| Cdk2     | 15.77  | 41.90   | 1.41   | 0.009501 |
| Myc      | 44.15  | 116.57  | 1.40   | 1.57E-06 |
| Mmp14    | 25.99  | 68.87   | 1.40   | 2.98E-05 |
| Tlr4     | 11.40  | 29.77   | 1.39   | 0.014332 |
| Cd33     | 22.77  | 59.69   | 1.38   | 0.000155 |
| Itga7    | 17.82  | 45.70   | 1.37   | 0.00163  |
| Itpr2    | 45.28  | 117.49  | 1.37   | 2.22E-05 |
| Gsn      | 99.13  | 253.79  | 1.36   | 3.80E-08 |
| Plxnb3   | 48.63  | 124.19  | 1.35   | 4.36E-05 |
| Pecam1   | 13.69  | 34.42   | 1.31   | 0.012856 |
| Tmem119  | 50.03  | 123.79  | 1.30   | 4.75E-07 |
| Pcna     | 200.51 | 492.34  | 1.30   | 3.00E-12 |
| Lif      | 11.60  | 28.49   | 1.29   | 0.025807 |
| Il10ra   | 31.24  | 75.64   | 1.29   | 6.19E-05 |
| Pfn1     | 688.06 | 1670.34 | 1.28   | 9.87E-16 |
| Il13ra1  | 19.62  | 46.92   | 1.27   | 0.002808 |
| Casp6    | 28.75  | 66.22   | 1.21   | 0.000247 |
| Pla2g4a  | 12.96  | 29.94   | 1.20   | 0.022685 |
| Pkn1     | 44.96  | 101.68  | 1.18   | 0.000325 |
| Col4a2   | 35.38  | 80.65   | 1.17   | 0.000344 |
| Casp7    | 19.00  | 41.40   | 1.14   | 0.009778 |
| Sgpl1    | 56.17  | 124.47  | 1.14   | 7.88E-05 |
| Cdkn1a   | 76.40  | 168.00  | 1.14   | 1.14E-05 |
| Plekho2  | 83.98  | 181.29  | 1.11   | 2.18E-07 |
| Nlrp3    | 14.45  | 30.21   | 1.06   | 0.050228 |
| Arrb2    | 92.39  | 190.25  | 1.04   | 8.07E-06 |
| Hdac7    | 85.29  | 175.53  | 1.04   | 0.000166 |
| Myrf     | 113.40 | 233.46  | 1.04   | 5.00E-05 |
| Fgf2     | 15.60  | 31.67   | 1.02   | 0.066744 |
| Mapkapk2 | 44.99  | 90.50   | 1.00   | 0.000828 |

Suppl. Table 2

| mRNA      | avg sh | avg str | log2FC | Padj     |
|-----------|--------|---------|--------|----------|
| C1qb      | 58.67  | 539.21  | 3.18   | 1.47E-25 |
| Ccl12     | 6.40   | 52.94   | 3.13   | 1.76E-07 |
| C1qc      | 53.60  | 458.66  | 3.09   | 1.25E-23 |
| C1qa      | 39.67  | 337.19  | 3.08   | 3.39E-23 |
| Cd68      | 43.10  | 346.21  | 3.02   | 4.48E-22 |
| Gfap      | 438.58 | 3094.39 | 2.81   | 2.74E-33 |
| Csf2rb    | 10.63  | 66.42   | 2.78   | 2.25E-10 |
| Hmox1     | 33.92  | 217.27  | 2.67   | 5.49E-21 |
| Itgam     | 35.77  | 221.01  | 2.63   | 7.17E-24 |
| Ncf1      | 49.08  | 297.31  | 2.60   | 1.03E-15 |
| Cd44      | 42.46  | 258.88  | 2.58   | 5.24E-15 |
| Nes       | 32.92  | 193.10  | 2.57   | 1.12E-22 |
| Trem2     | 42.24  | 246.00  | 2.56   | 2.89E-22 |
| Fcrls     | 30.59  | 167.40  | 2.40   | 1.57E-16 |
| Il4ra     | 52.97  | 281.12  | 2.40   | 1.47E-17 |
| Tnfrsf1b  | 34.74  | 176.52  | 2.32   | 7.56E-17 |
| Irf8      | 35.74  | 179.69  | 2.30   | 4.55E-12 |
| Ccr5      | 32.80  | 157.71  | 2.30   | 6.50E-16 |
| Psmb8     | 26.52  | 129.89  | 2.28   | 1.90E-14 |
| Casp8     | 17.11  | 83.21   | 2.26   | 6.61E-09 |
| Msn       | 34.65  | 170.30  | 2.25   | 2.72E-12 |
| Osmr      | 16.36  | 76.86   | 2.22   | 1.54E-09 |
| Bcas1     | 180.46 | 813.48  | 2.18   | 2.52E-12 |
| Lrrc25    | 12.08  | 49.01   | 2.11   | 4.84E-05 |
| Fn1       | 84.35  | 356.93  | 2.10   | 2.82E-14 |
| Tcirg1    | 92.94  | 391.44  | 2.07   | 3.75E-16 |
| Stab1     | 29.61  | 118.54  | 2.02   | 9.20E-09 |
| Tnc       | 45.25  | 178.00  | 2.02   | 5.26E-07 |
| Tnfrsf1a  | 40.99  | 164.08  | 2.00   | 4.17E-09 |
| Nlrp3     | 12.80  | 49.83   | 1.99   | 1.69E-06 |
| Slc11a1   | 9.04   | 36.79   | 1.99   | 5.25E-05 |
| Hpgds     | 62.93  | 239.64  | 1.96   | 5.35E-13 |
| Cx3cr1    | 409.28 | 1547.84 | 1.92   | 7.01E-12 |
| Tspo      | 19.86  | 69.93   | 1.87   | 3.58E-07 |
| Grn       | 114.64 | 415.28  | 1.85   | 7.29E-08 |
| Cybb      | 9.90   | 37.26   | 1.85   | 0.000303 |
| Tlr2      | 11.68  | 41.08   | 1.84   | 7.97E-05 |
| Itga5     | 30.81  | 104.68  | 1.83   | 2.69E-05 |
| Cxcl16    | 26.64  | 90.64   | 1.81   | 2.15E-05 |
| Csf1r     | 244.52 | 851.83  | 1.81   | 2.16E-12 |
| Tgfb1     | 44.24  | 153.51  | 1.80   | 1.00E-08 |
| Icam1     | 9.43   | 32.81   | 1.79   | 0.000971 |
| Cdk2      | 22.61  | 78.32   | 1.78   | 1.90E-05 |
| Il10ra    | 51.64  | 168.11  | 1.69   | 4.44E-07 |
| Hspb1     | 43.41  | 139.81  | 1.67   | 0.001139 |
| Spi1      | 24.27  | 79.24   | 1.67   | 8.42E-05 |
| Cspg4     | 32.60  | 101.55  | 1.66   | 6.37E-07 |
| Hexb      | 290.29 | 892.95  | 1.62   | 5.12E-12 |
| Csf1      | 73.20  | 221.98  | 1.60   | 2.82E-08 |
| Trf       | 641.55 | 1918.99 | 1.58   | 1.62E-09 |
| Sp100     | 24.91  | 72.37   | 1.55   | 0.000173 |
| Myc       | 64.75  | 187.60  | 1.54   | 4.00E-09 |
| Cd9       | 53.16  | 152.56  | 1.53   | 2.06E-08 |
| Lif       | 14.76  | 41.76   | 1.50   | 0.000949 |
| Ccnd1     | 612.13 | 1712.53 | 1.48   | 5.58E-09 |
| Ccr2      | 25.64  | 67.86   | 1.48   | 0.000502 |
| Tgfb2     | 56.67  | 155.89  | 1.45   | 2.67E-05 |
| Tnf       | 10.49  | 29.53   | 1.45   | 0.010063 |
| Ltbr      | 34.57  | 97.37   | 1.44   | 6.77E-05 |
| Nfe2l2    | 149.76 | 406.26  | 1.44   | 6.81E-08 |
| Tnfrsf12a | 24.87  | 68.94   | 1.44   | 0.00022  |
| Cd33      | 36.76  | 97.68   | 1.43   | 7.46E-05 |
| Cp        | 36.54  | 94.97   | 1.39   | 1.08E-05 |
| Gjb1      | 107.80 | 275.98  | 1.37   | 3.01E-08 |
| P2rx7     | 66.87  | 170.64  | 1.35   | 2.52E-05 |
| Gsn       | 132.49 | 336.21  | 1.34   | 1.53E-07 |
| Tmem119   | 94.77  | 237.29  | 1.33   | 7.58E-06 |
| Epha2     | 11.94  | 29.14   | 1.33   | 0.015798 |
| Plcb2     | 29.12  | 73.57   | 1.30   | 0.000737 |
| Gpr84     | 9.84   | 23.14   | 1.29   | 0.043378 |
| Tlr4      | 20.42  | 50.44   | 1.28   | 0.013009 |
| Stat3     | 158.14 | 380.69  | 1.27   | 7.60E-06 |
| Casp7     | 26.94  | 64.04   | 1.23   | 0.0496   |
| Gusb      | 57.42  | 133.49  | 1.21   | 7.97E-05 |
| Tnfrsf10b | 10.63  | 22.55   | 1.19   | 0.086192 |
| Psmb9     | 23.98  | 54.63   | 1.18   | 0.005509 |
| Plcb3     | 51.73  | 118.85  | 1.17   | 6.39E-05 |
| Eng       | 53.29  | 116.38  | 1.17   | 0.002662 |
| Il1r1     | 76.98  | 171.10  | 1.17   | 6.88E-07 |
| Stat1     | 86.53  | 191.90  | 1.16   | 3.38E-05 |
| Itpr2     | 132.97 | 288.19  | 1.13   | 5.51E-06 |
| Phf19     | 16.22  | 34.71   | 1.09   | 0.047613 |
| Casp1     | 12.67  | 26.97   | 1.09   | 0.053016 |
| Notch1    | 125.95 | 266.27  | 1.09   | 4.81E-05 |
| Il6ra     | 45.97  | 96.91   | 1.06   | 0.000442 |
| Pfn1      | 947.83 | 1957.05 | 1.05   | 0.000122 |
| Cdkn1a    | 158.06 | 329.32  | 1.05   | 0.000377 |
| Gdnf      | 12.95  | 26.17   | 1.04   | 0.091634 |

Suppl.Table 3

| mRNA      | avg sh | avg str | log2FC | Padj     |
|-----------|--------|---------|--------|----------|
| Gfap      | 337.06 | 2928.32 | 3.12   | 0.000191 |
| Hmox1     | 32.35  | 242.43  | 2.91   | 1.01E-06 |
| C1qc      | 41.97  | 262.46  | 2.64   | 1.22E-05 |
| Tgfb1     | 20.38  | 118.75  | 2.54   | 0.001084 |
| C1qa      | 38.47  | 224.20  | 2.54   | 0.000191 |
| C1qb      | 65.80  | 362.41  | 2.46   | 0.013036 |
| Cd44      | 30.82  | 159.37  | 2.37   | 0.000599 |
| Ncf1      | 37.23  | 191.94  | 2.37   | 0.001115 |
| Cd68      | 46.07  | 234.75  | 2.35   | 0.037777 |
| Csf2rb    | 10.82  | 53.79   | 2.34   | 0.024867 |
| Tnfrsf1b  | 25.24  | 127.96  | 2.33   | 0.003912 |
| Fn1       | 73.62  | 367.47  | 2.32   | 0.060245 |
| Fcrls     | 23.59  | 114.55  | 2.27   | 0.002458 |
| Ccr2      | 14.73  | 71.13   | 2.27   | 0.022323 |
| Nes       | 29.41  | 141.39  | 2.27   | 0.006308 |
| Msn       | 28.70  | 132.50  | 2.21   | 0.00922  |
| Itga5     | 19.86  | 92.11   | 2.20   | 0.022323 |
| Trem2     | 34.50  | 154.24  | 2.16   | 0.001084 |
| Tnfrsf1a  | 24.84  | 109.94  | 2.16   | 0.005658 |
| Il4ra     | 38.55  | 164.61  | 2.09   | 0.005245 |
| Itgam     | 37.63  | 154.85  | 2.04   | 0.00701  |
| Psmb8     | 26.51  | 106.12  | 2.01   | 0.024867 |
| Irf8      | 29.37  | 117.03  | 1.99   | 0.001084 |
| Ccl12     | 10.32  | 39.30   | 1.96   | 0.026683 |
| Tcirg1    | 80.20  | 298.46  | 1.90   | 0.067986 |
| Lif       | 11.82  | 43.50   | 1.89   | 0.026683 |
| Grn       | 69.67  | 242.72  | 1.80   | 0.063853 |
| Sp100     | 20.36  | 67.93   | 1.74   | 0.061507 |
| Il10ra    | 37.08  | 124.34  | 1.74   | 0.013036 |
| Tspo      | 19.91  | 64.25   | 1.71   | 0.055405 |
| Trf       | 575.98 | 1864.24 | 1.69   | 0.023845 |
| Osmr      | 21.79  | 65.10   | 1.59   | 0.039337 |
| Ccr5      | 34.44  | 103.34  | 1.58   | 0.028206 |
| Cx3cr1    | 351.67 | 1042.06 | 1.57   | 0.024867 |
| Nlrp3     | 15.75  | 44.19   | 1.51   | 0.041155 |
| Ltbr      | 27.97  | 77.55   | 1.49   | 0.05714  |
| Csf1r     | 223.47 | 621.06  | 1.47   | 0.026683 |
| Casp8     | 18.59  | 50.85   | 1.45   | 0.062259 |
| Spi1      | 23.91  | 62.24   | 1.40   | 0.063043 |
| Cd9       | 44.38  | 115.45  | 1.39   | 0.045874 |
| Il13ra1   | 21.80  | 54.77   | 1.35   | 0.028478 |
| Tnfrsf12a | 16.65  | 41.78   | 1.34   | 0.060245 |
| Hexb      | 269.80 | 680.96  | 1.34   | 0.067986 |
| Hspb1     | 36.56  | 91.40   | 1.33   | 0.026683 |
| Csf1      | 82.64  | 207.29  | 1.32   | 0.004387 |
| Hpgds     | 64.96  | 161.40  | 1.31   | 0.013036 |
| Tgfbr2    | 52.52  | 129.24  | 1.30   | 0.048391 |
| Tlr4      | 13.71  | 32.96   | 1.26   | 0.099062 |
| Cd33      | 30.02  | 72.73   | 1.26   | 0.044327 |
| Stab1     | 25.20  | 59.83   | 1.25   | 0.080157 |
| Gusb      | 42.88  | 100.52  | 1.23   | 0.052605 |
| Myc       | 72.28  | 165.01  | 1.18   | 0.033679 |
| Stat1     | 80.47  | 181.63  | 1.17   | 0.03192  |
| Cp        | 38.55  | 87.33   | 1.17   | 0.05714  |
| Gsn       | 134.99 | 298.80  | 1.15   | 0.004387 |
| Il6ra     | 40.85  | 89.43   | 1.13   | 0.084853 |
| Il1r1     | 66.94  | 147.33  | 1.13   | 0.026683 |
| Gjb1      | 86.33  | 188.23  | 1.13   | 0.022323 |
| Stat3     | 130.44 | 274.51  | 1.07   | 0.00922  |
| Tmem119   | 70.78  | 145.42  | 1.04   | 0.067986 |

# Suppl. Fig. 1

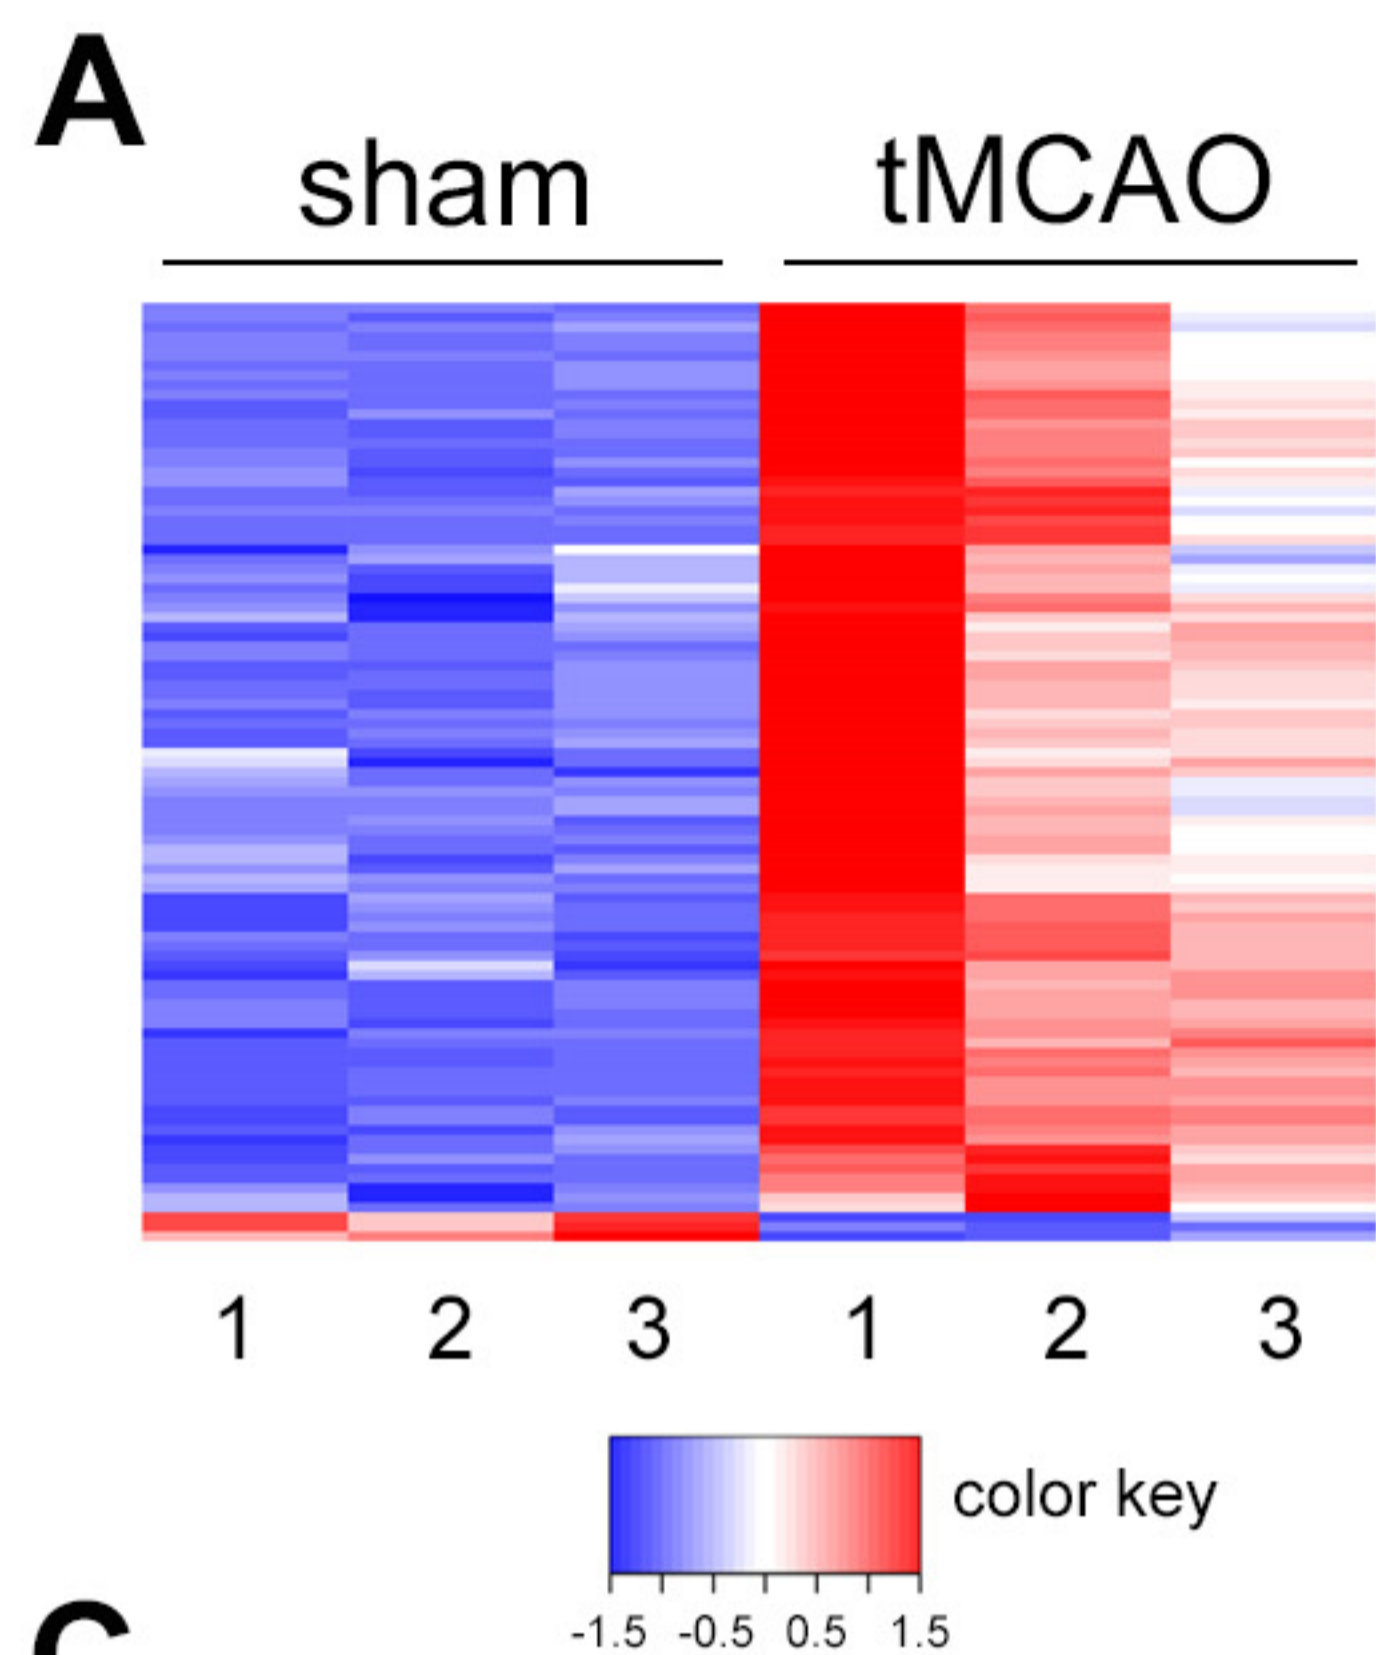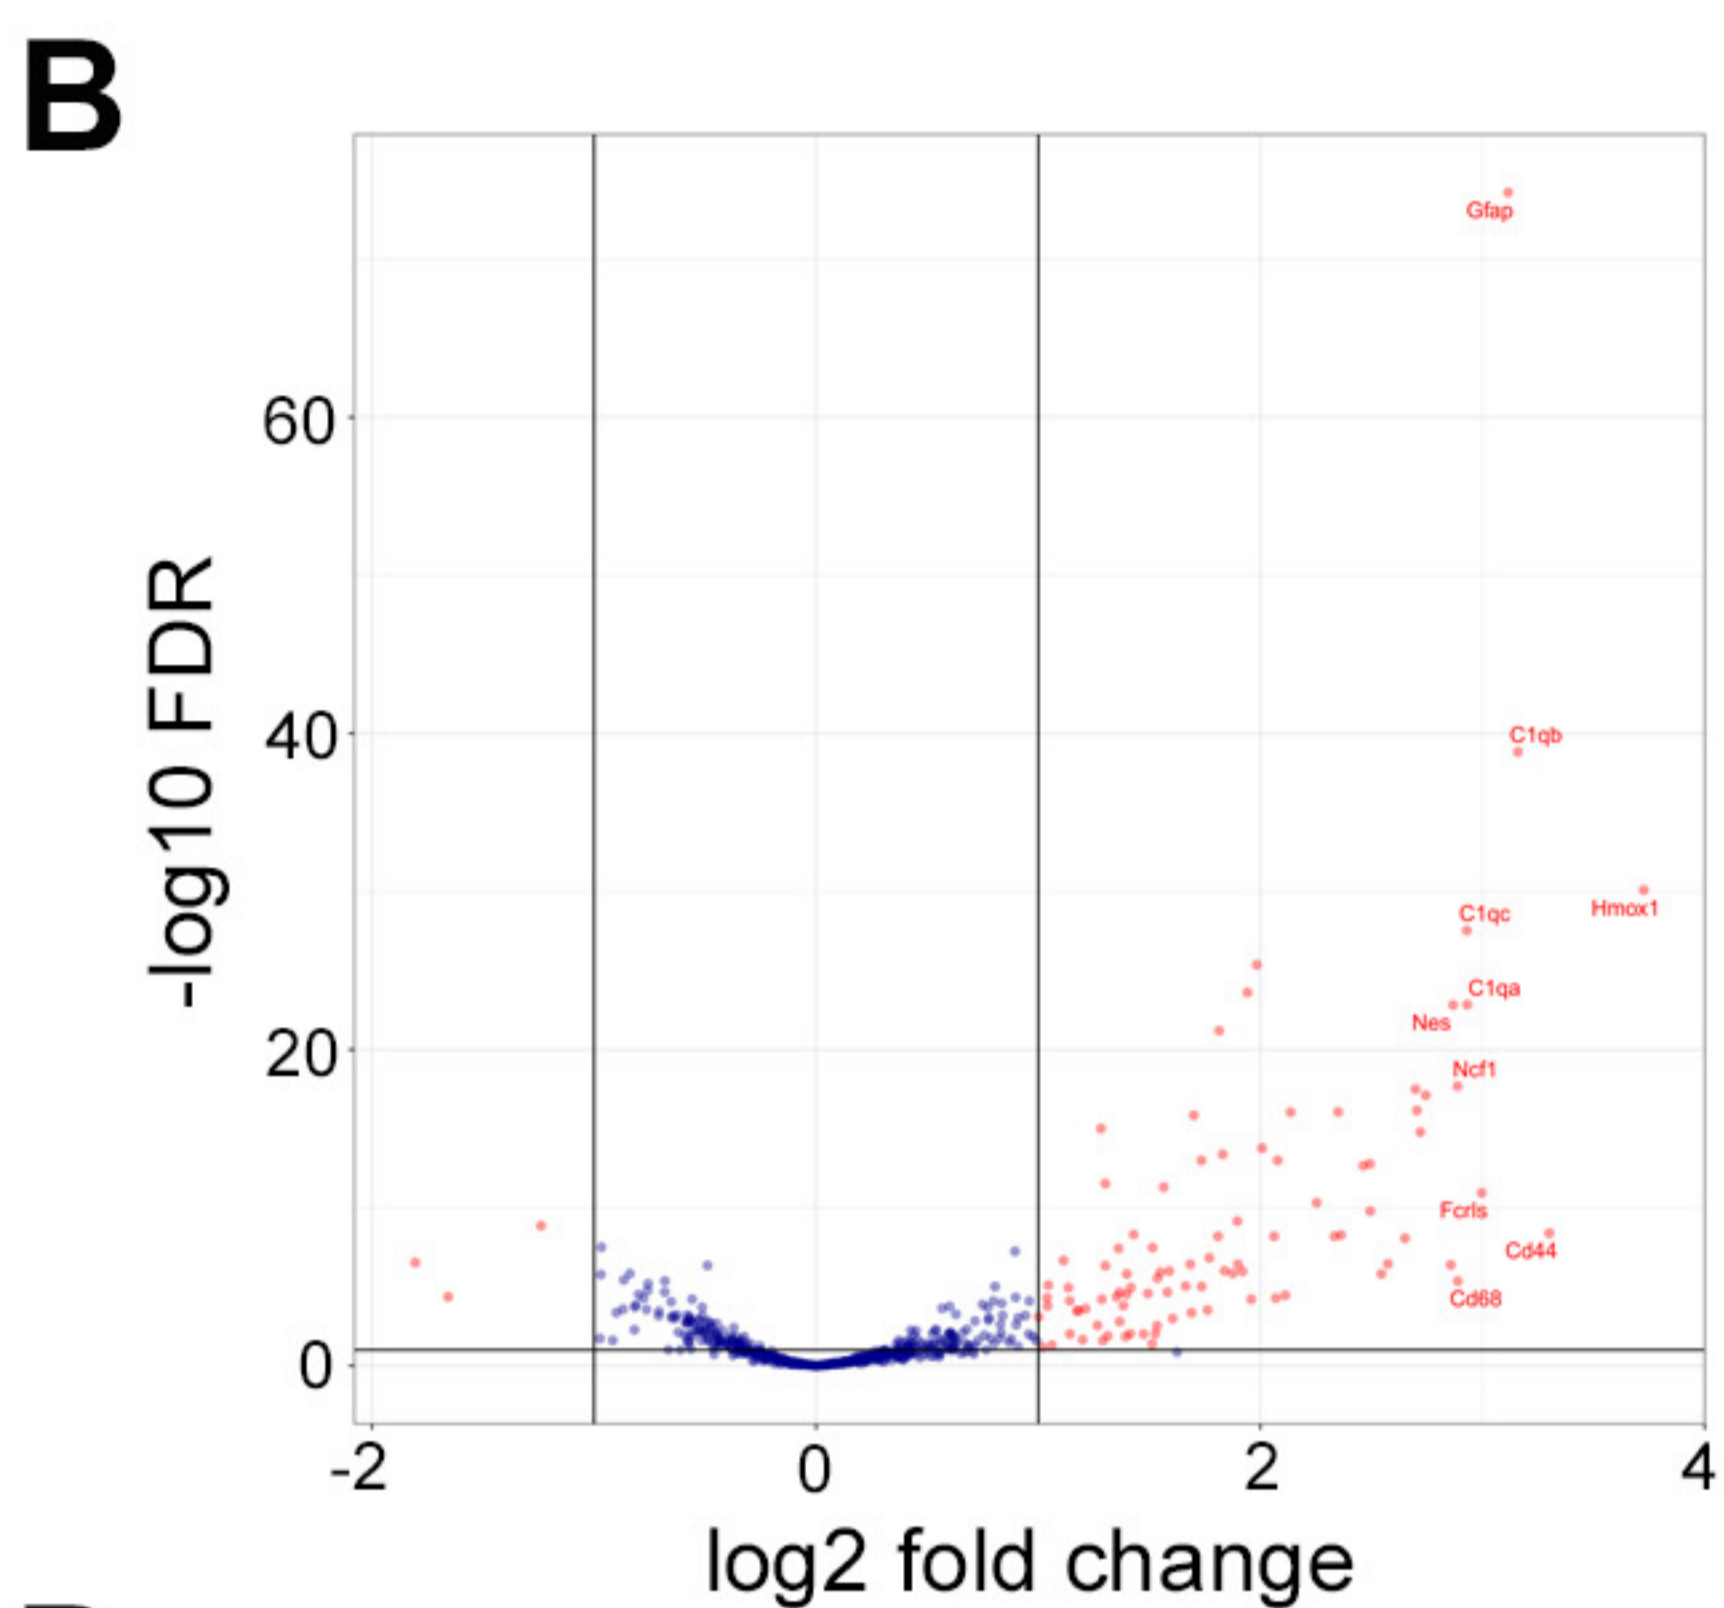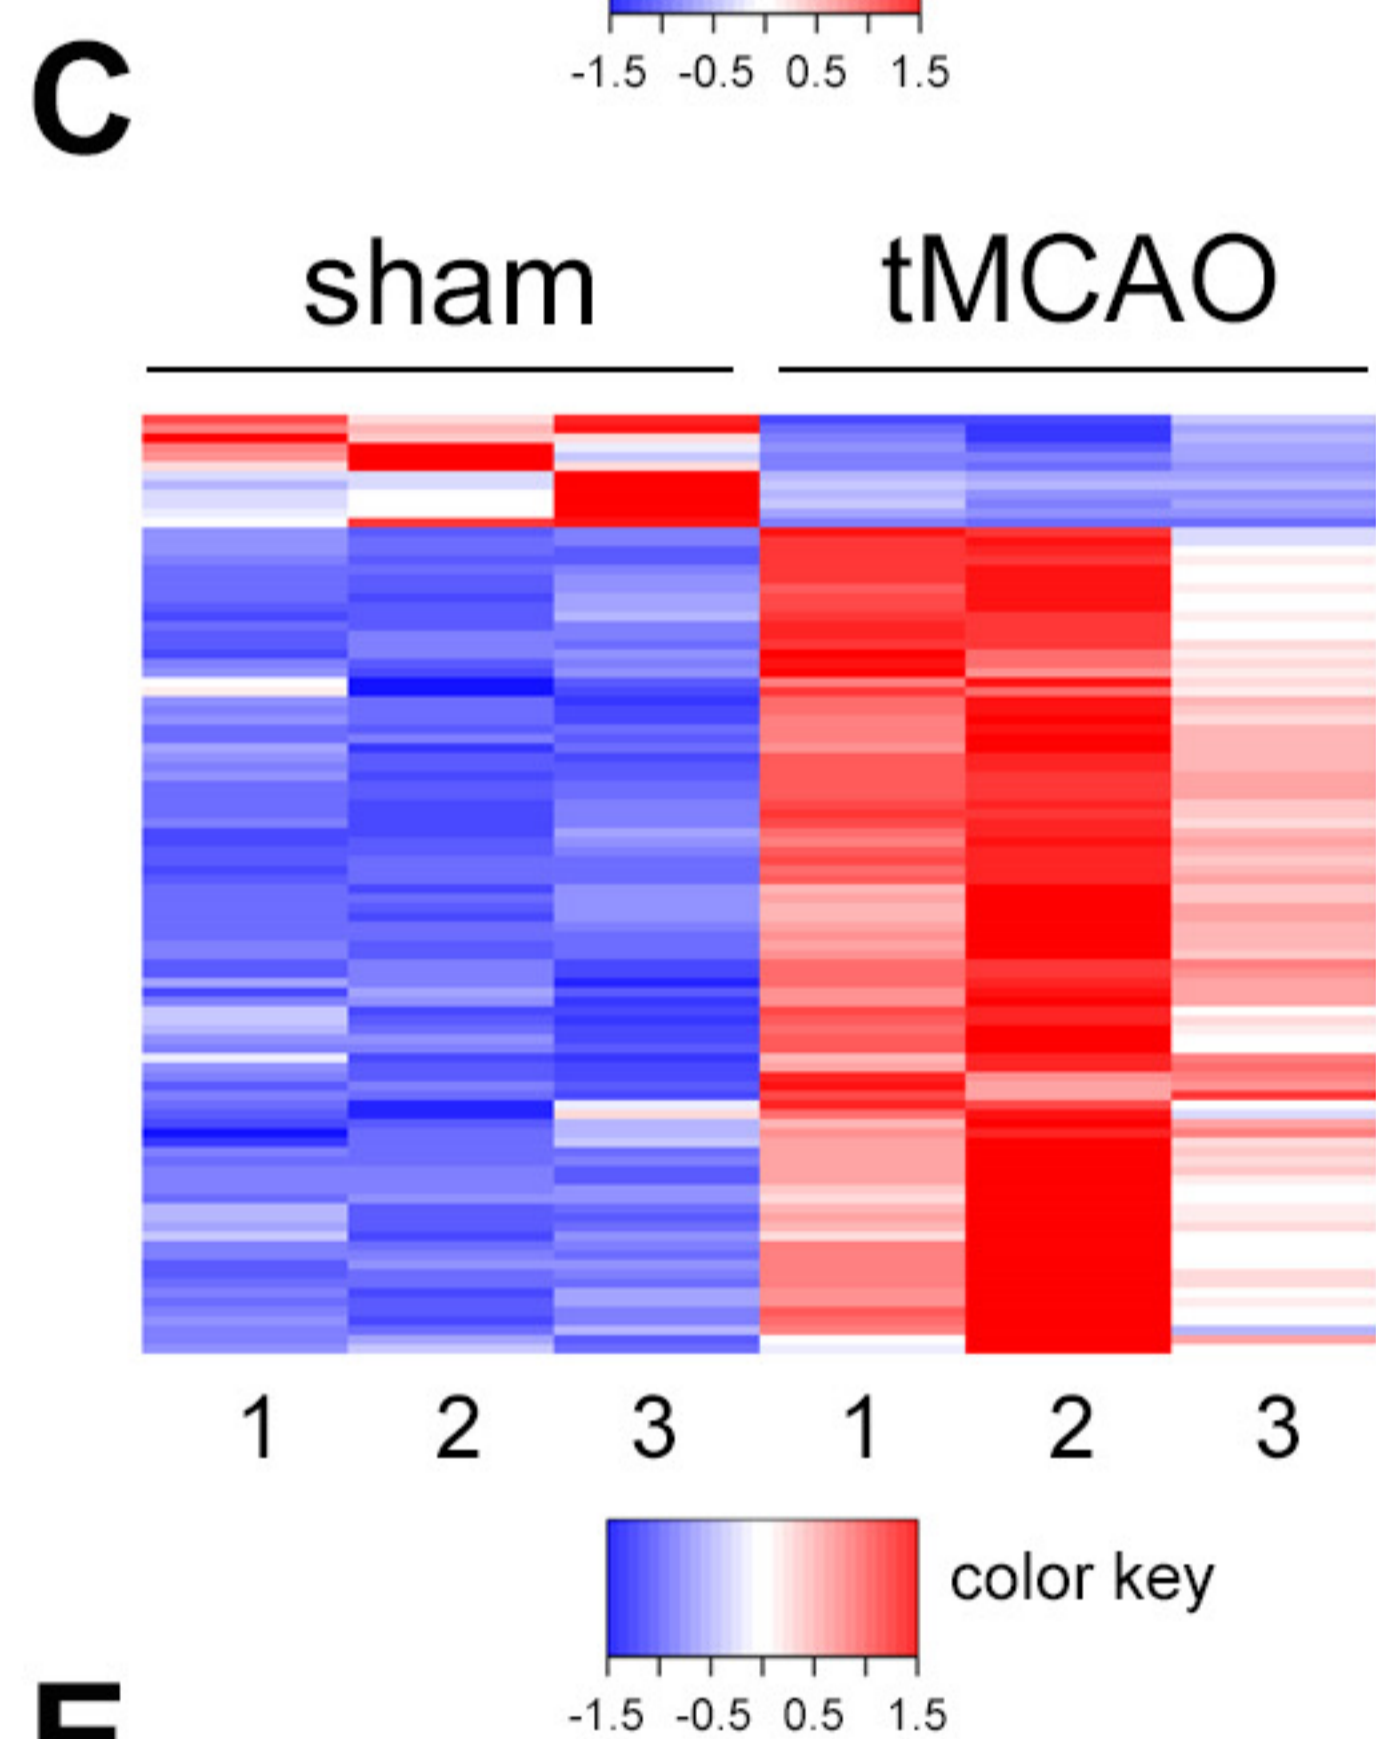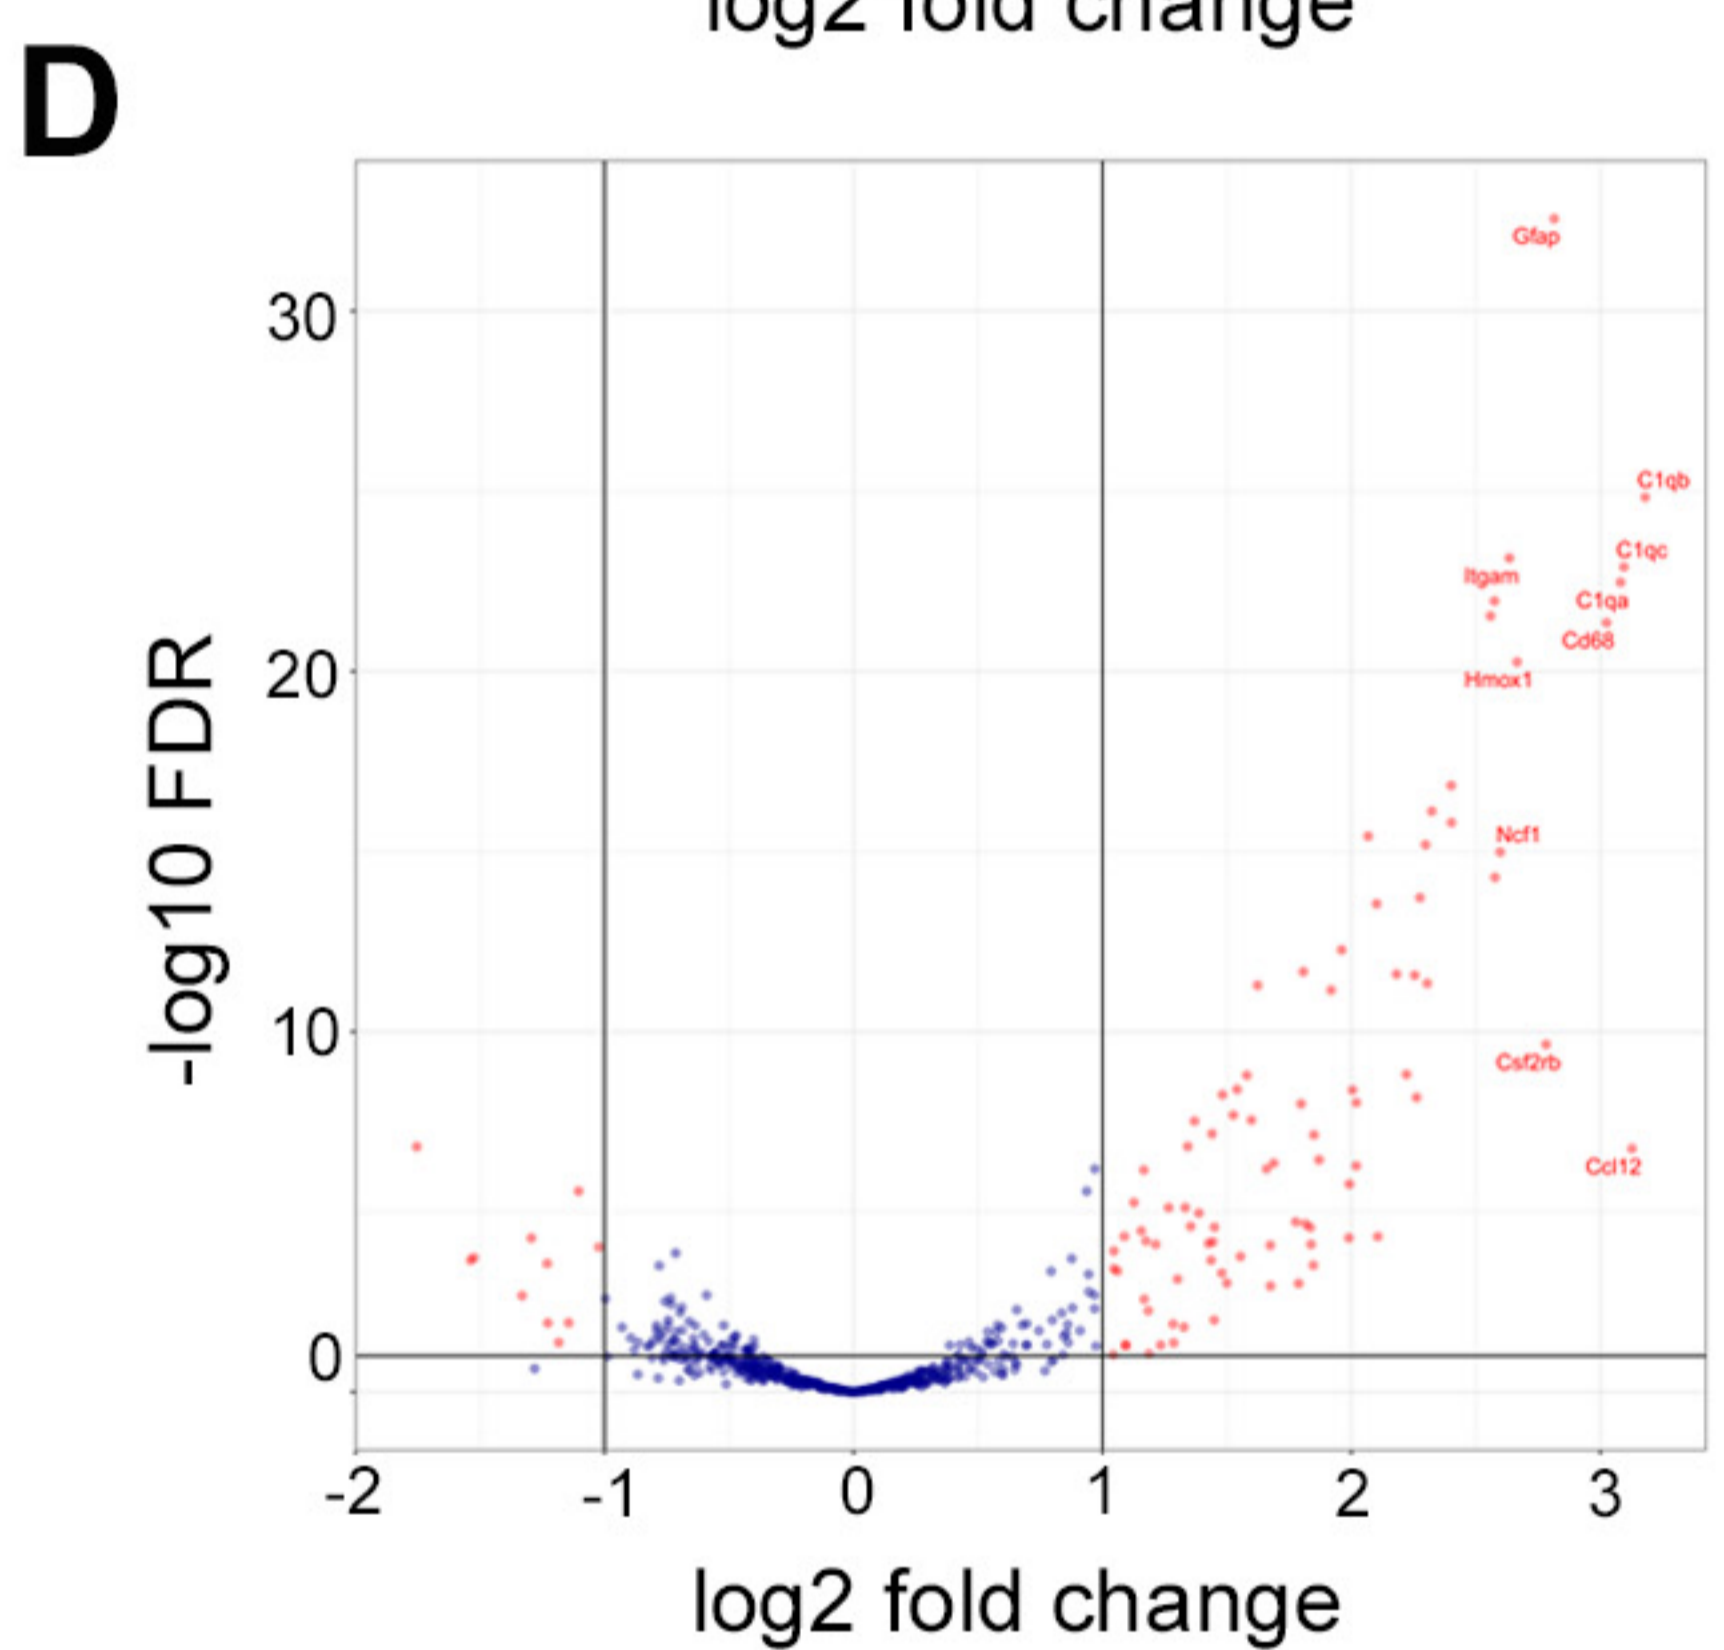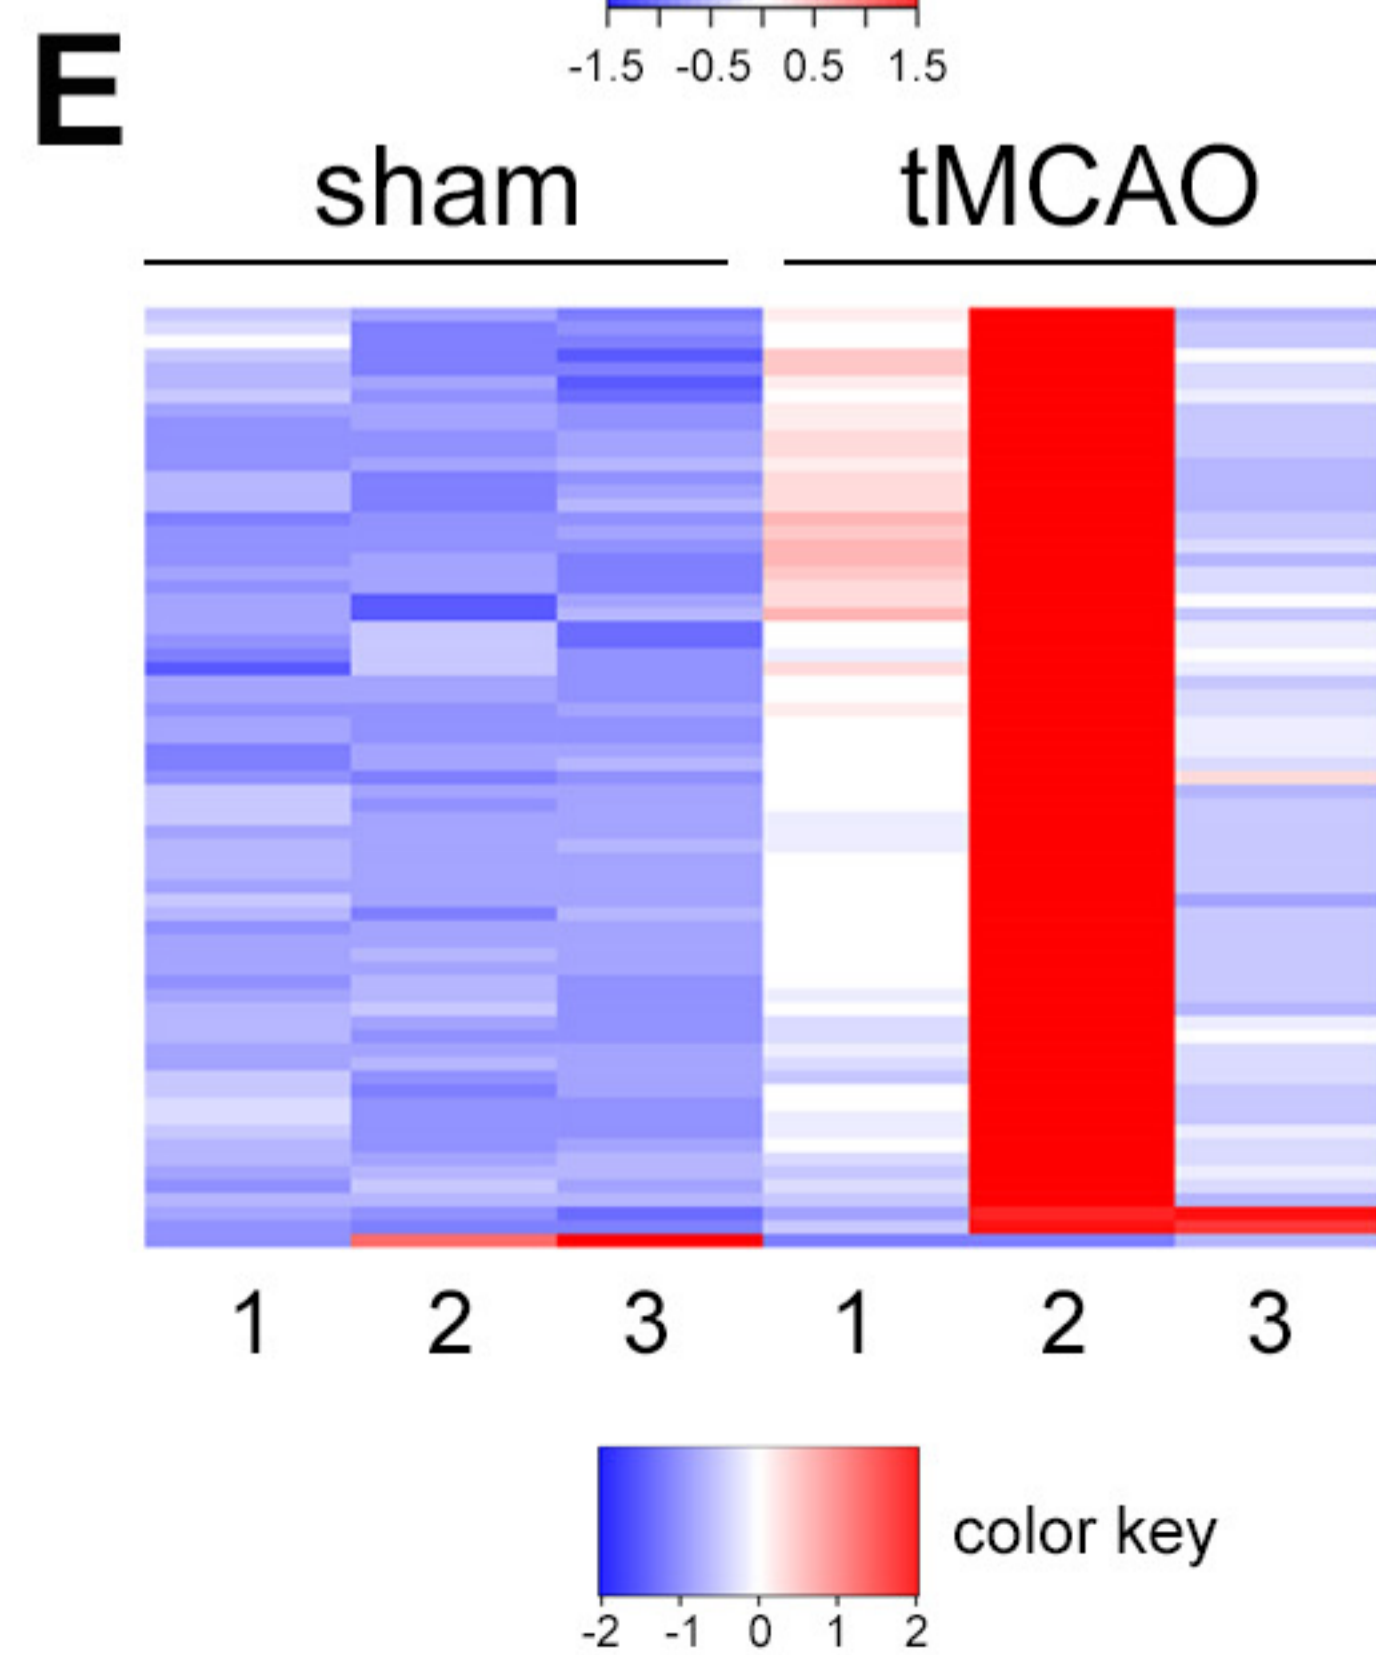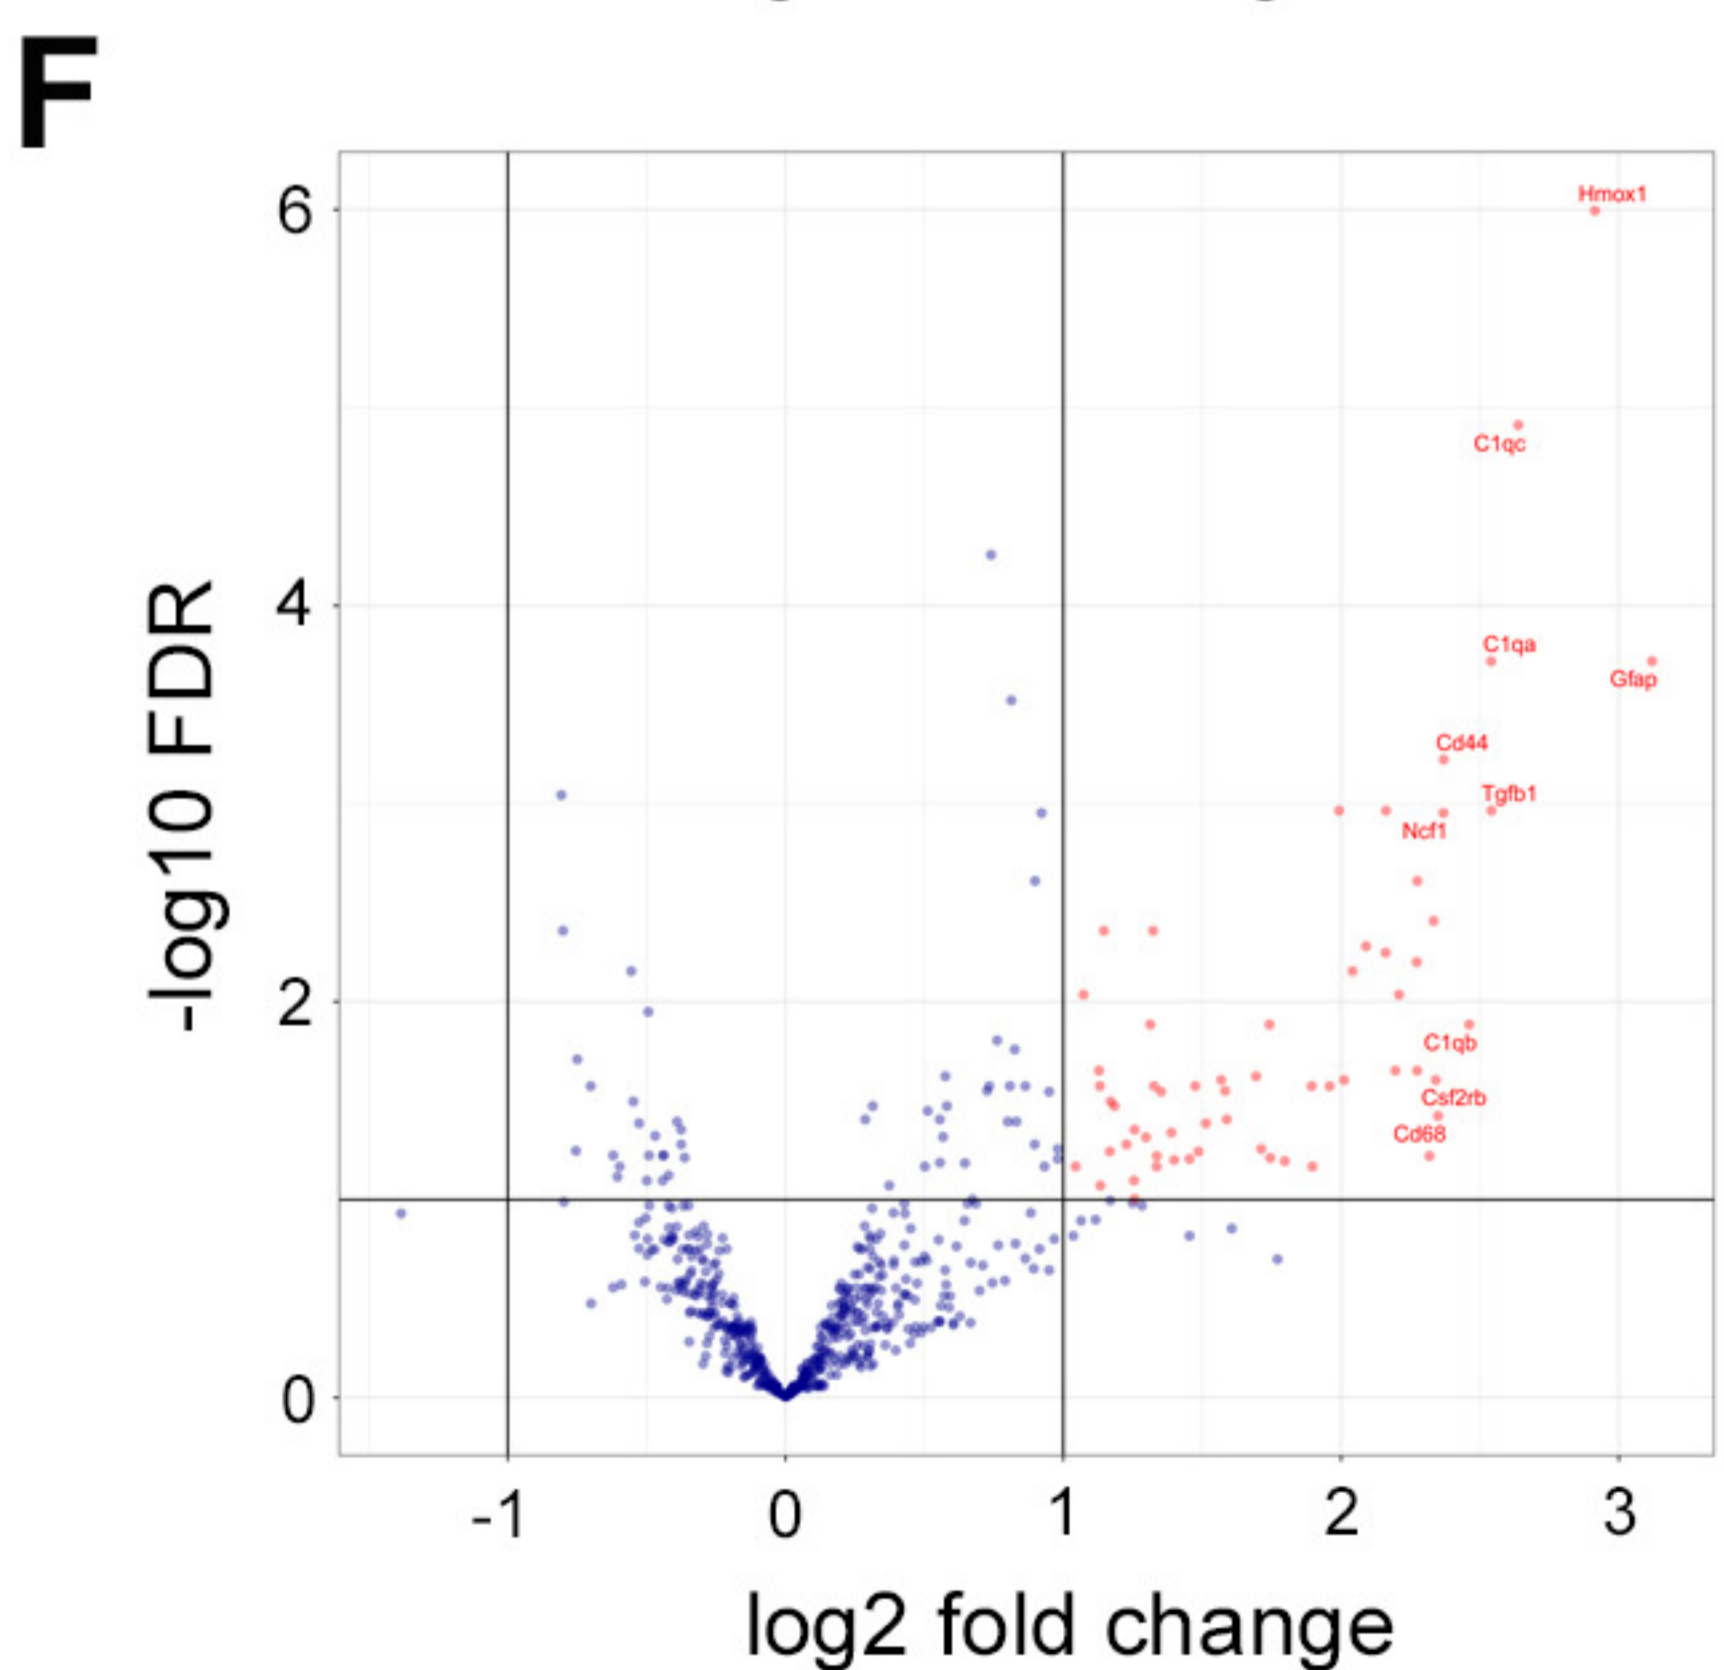



# Suppl. Fig. 2

## A

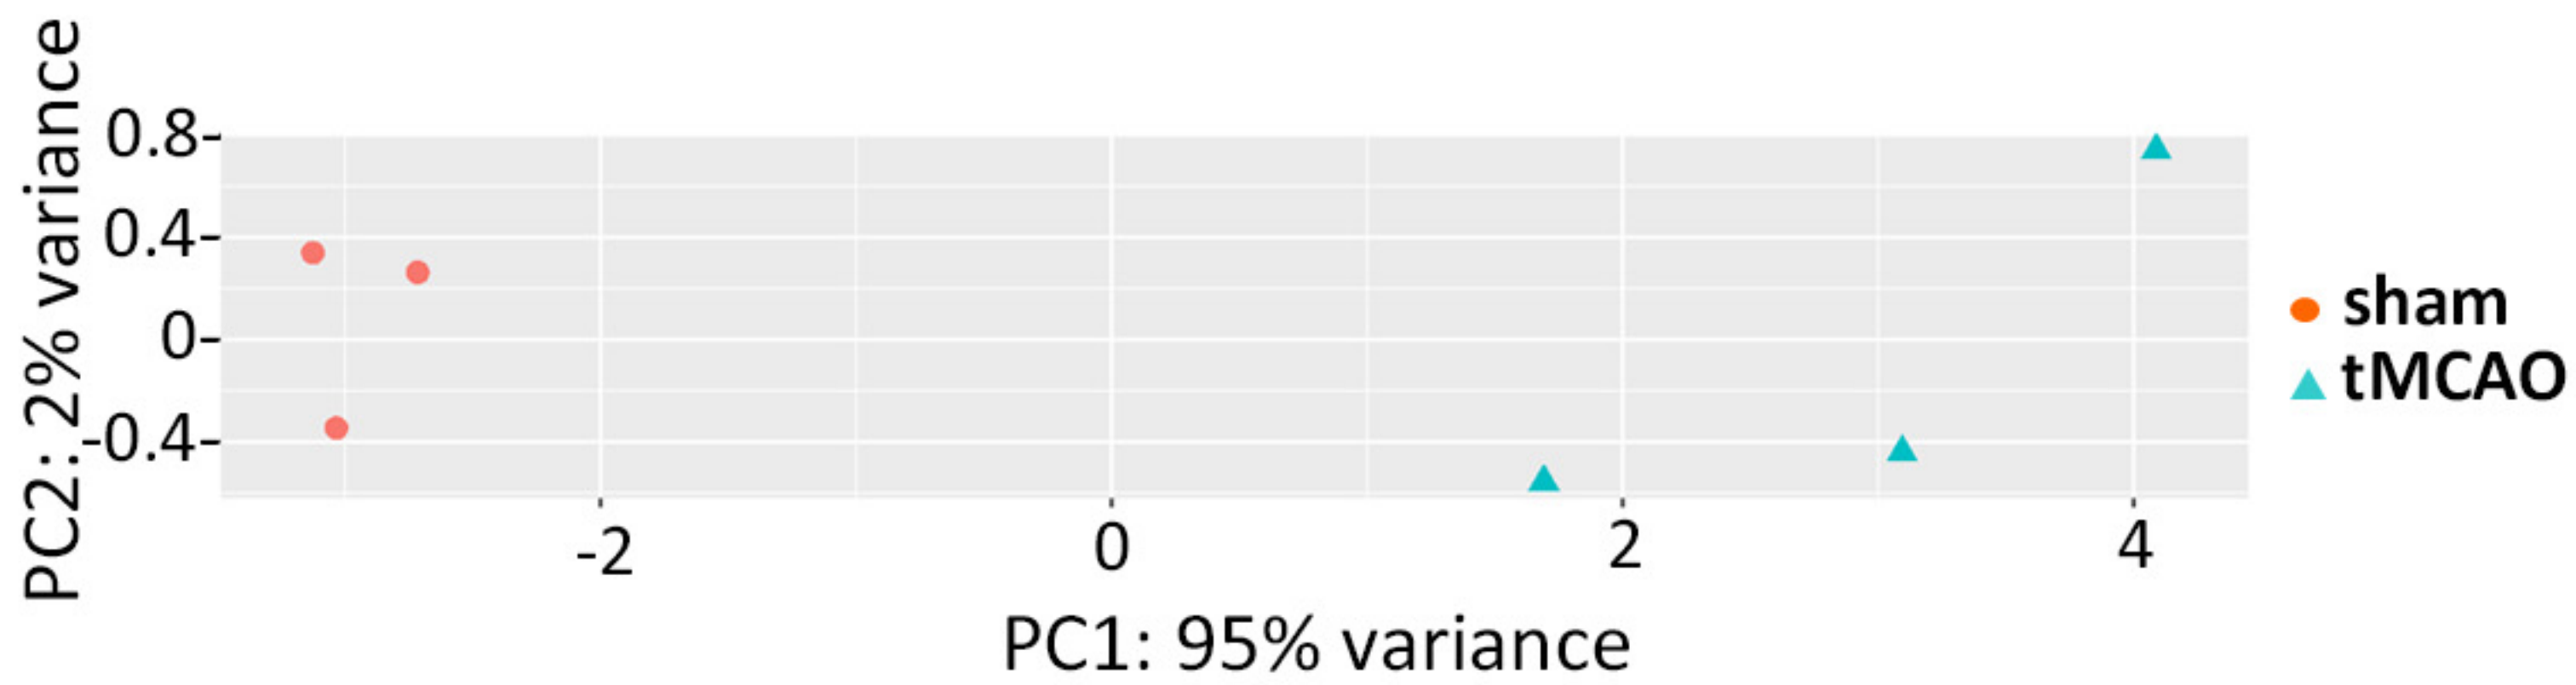

## B

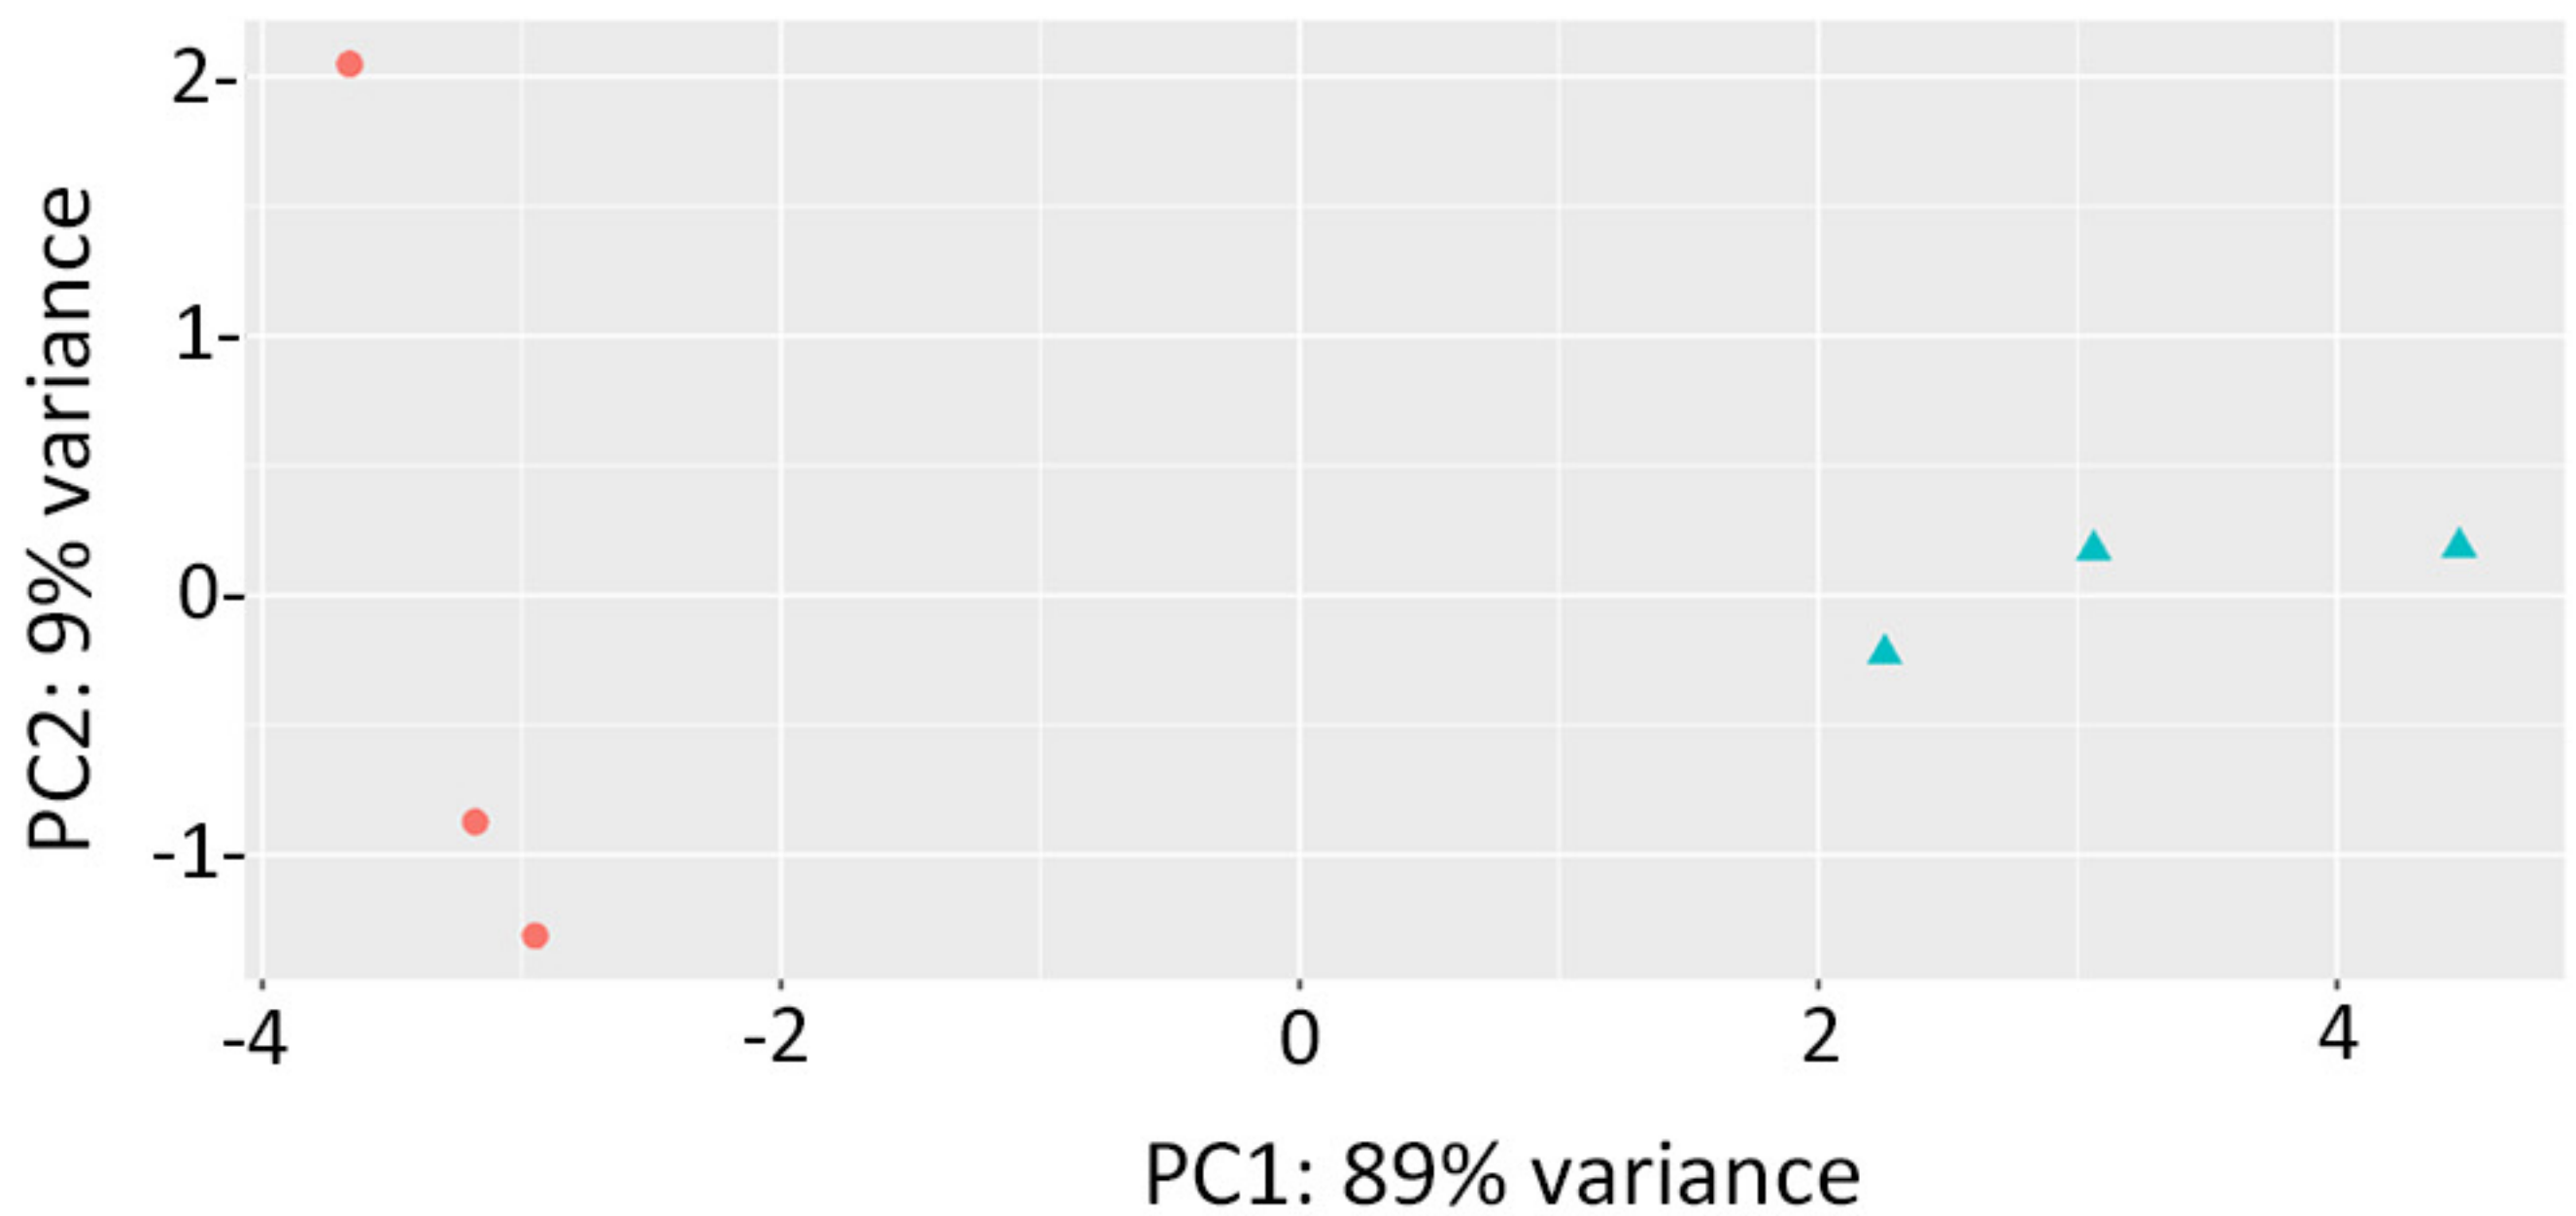

## C

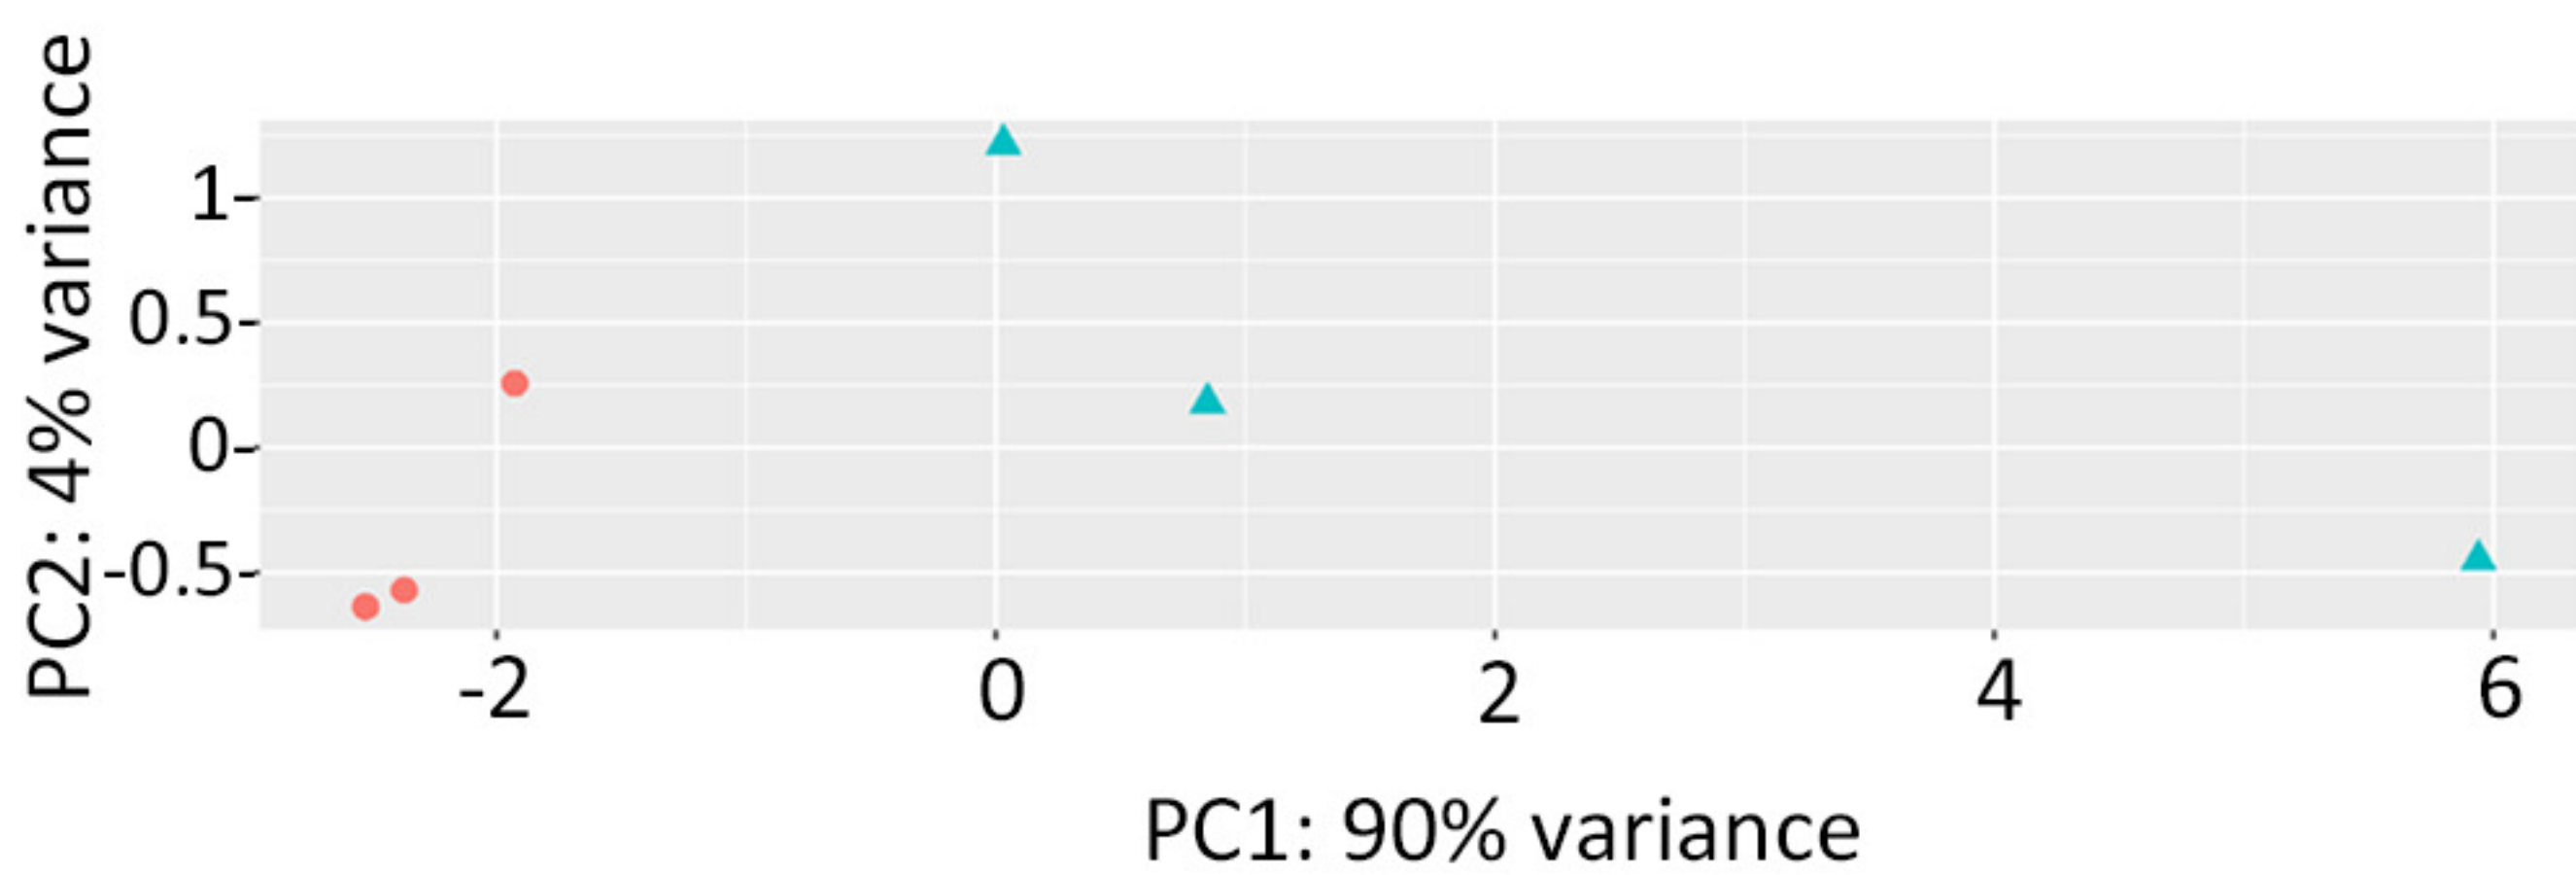

# Suppl. Fig. 3

## A

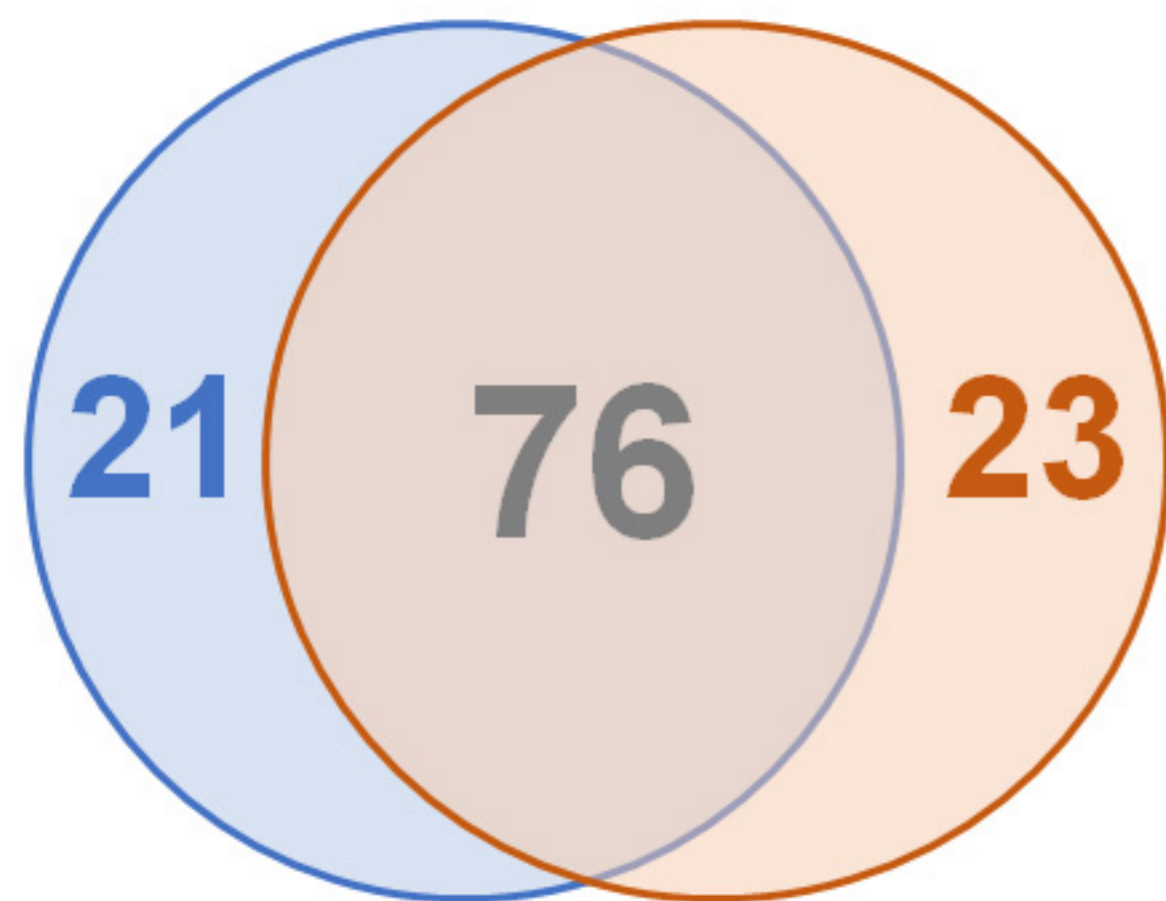

F+I

F+NI

$|\log_2 FC| \geq 1$

## B

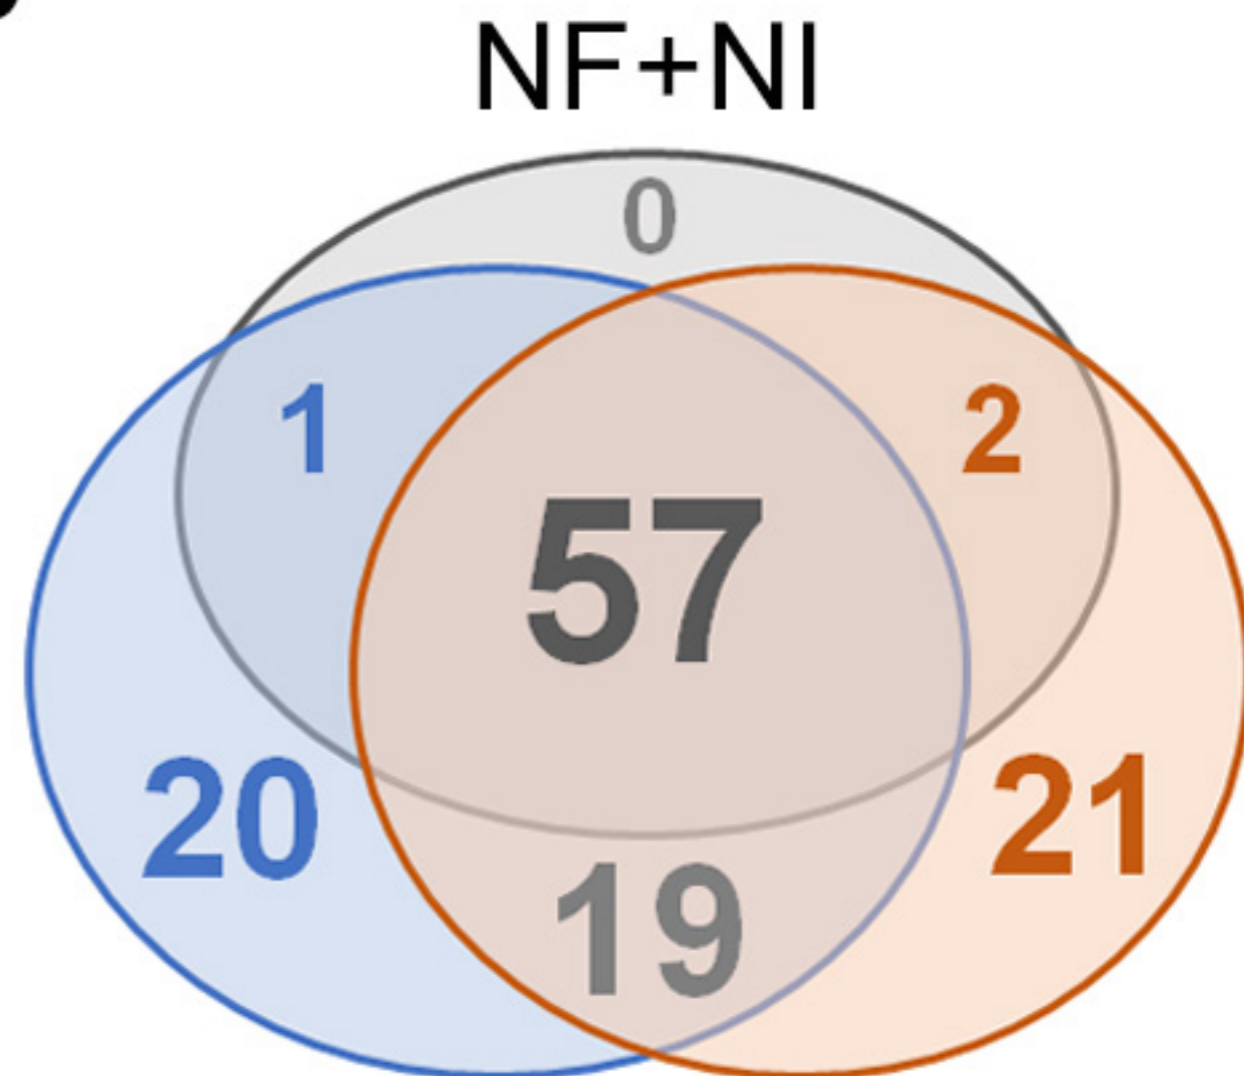

NF+NI

F+I

F+NI

$|\log_2 FC| \geq 1$



# Suppl. Fig. 4

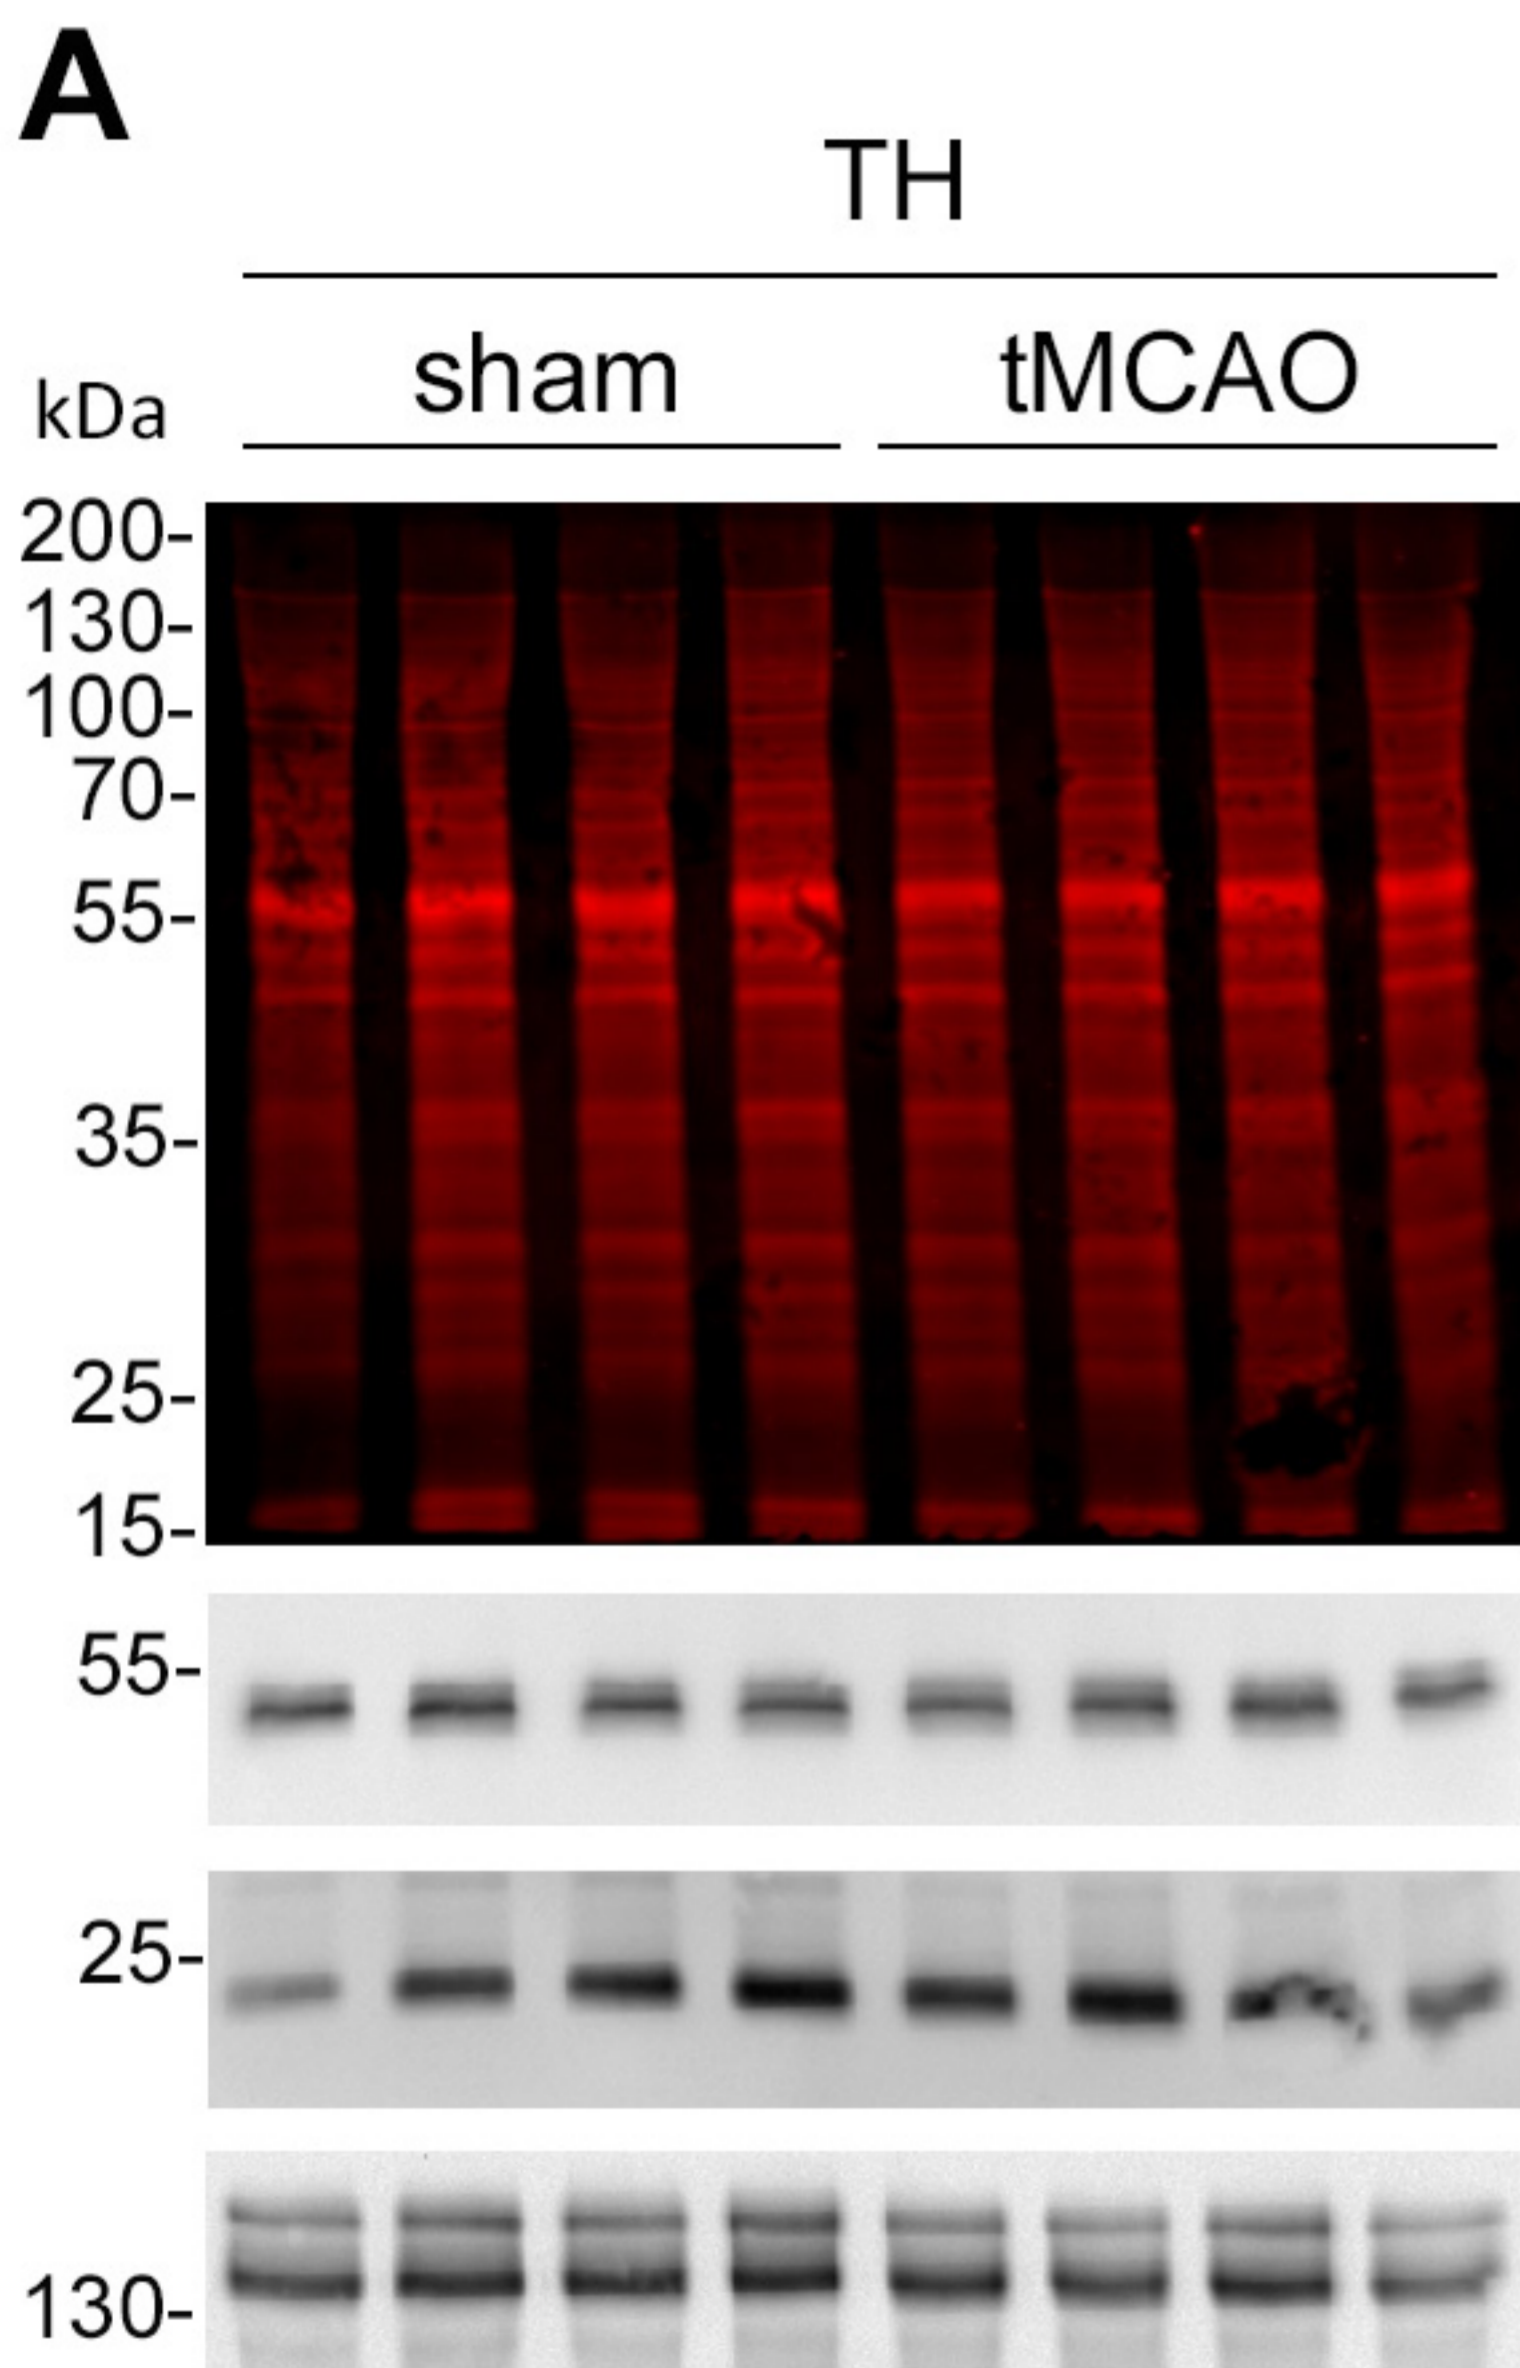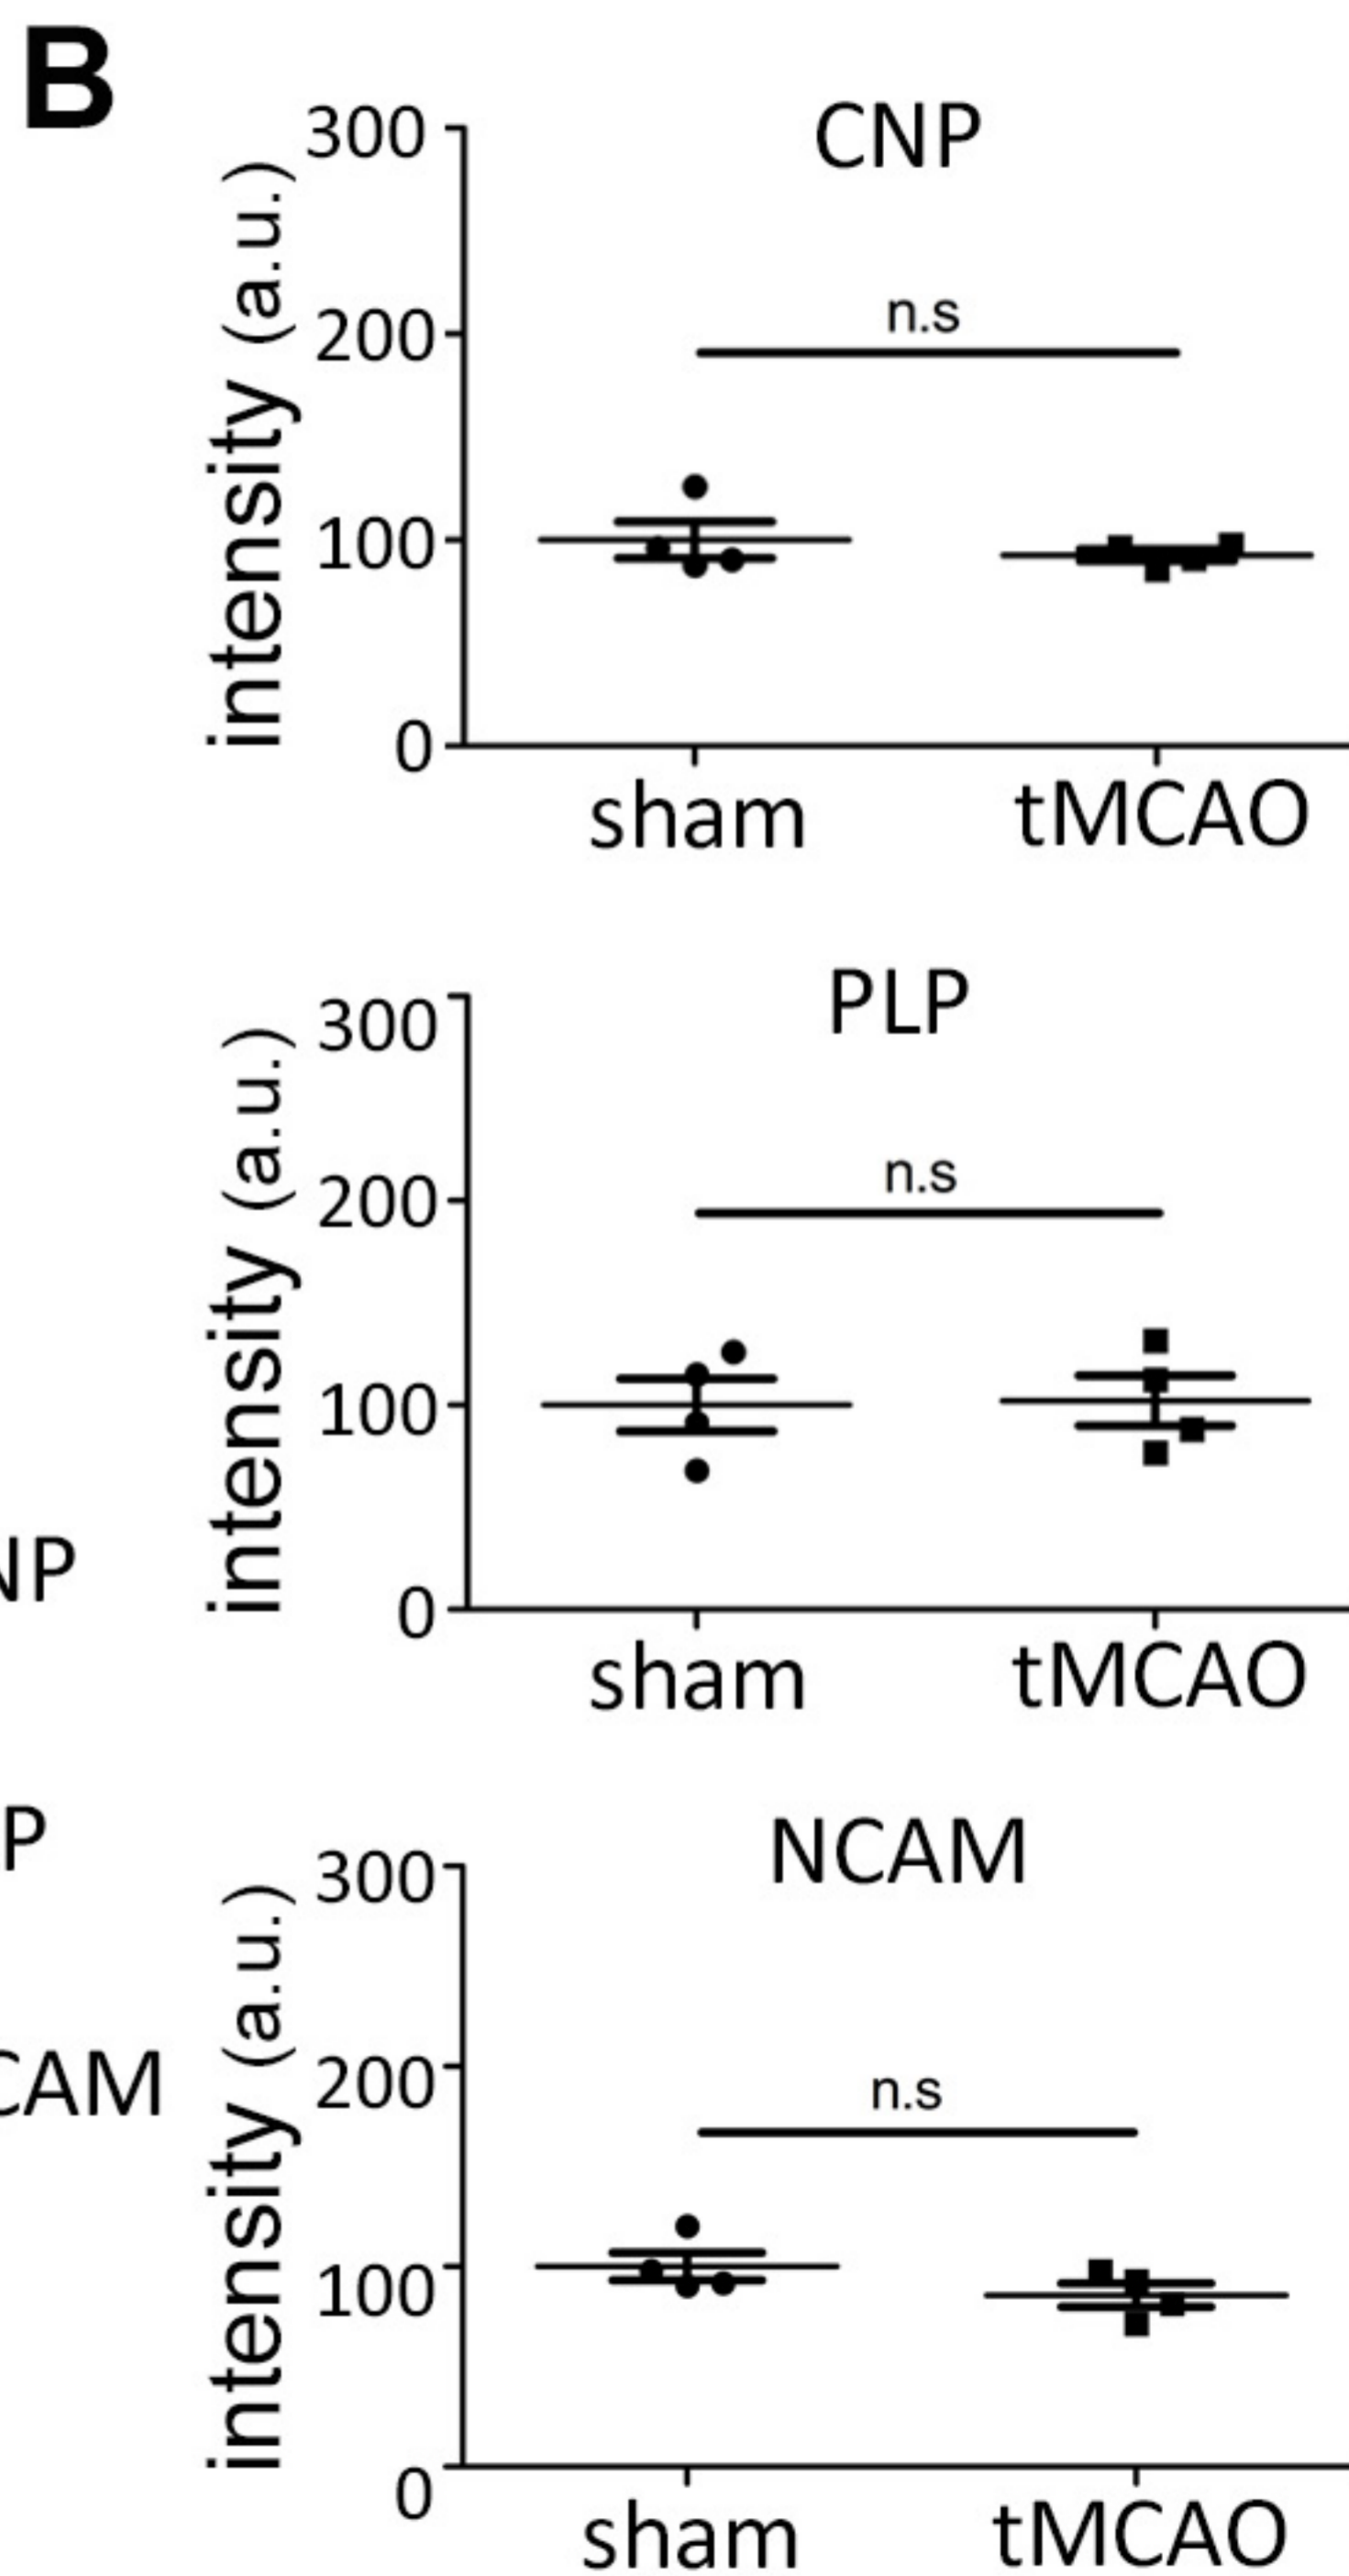



# Suppl. Fig. 5

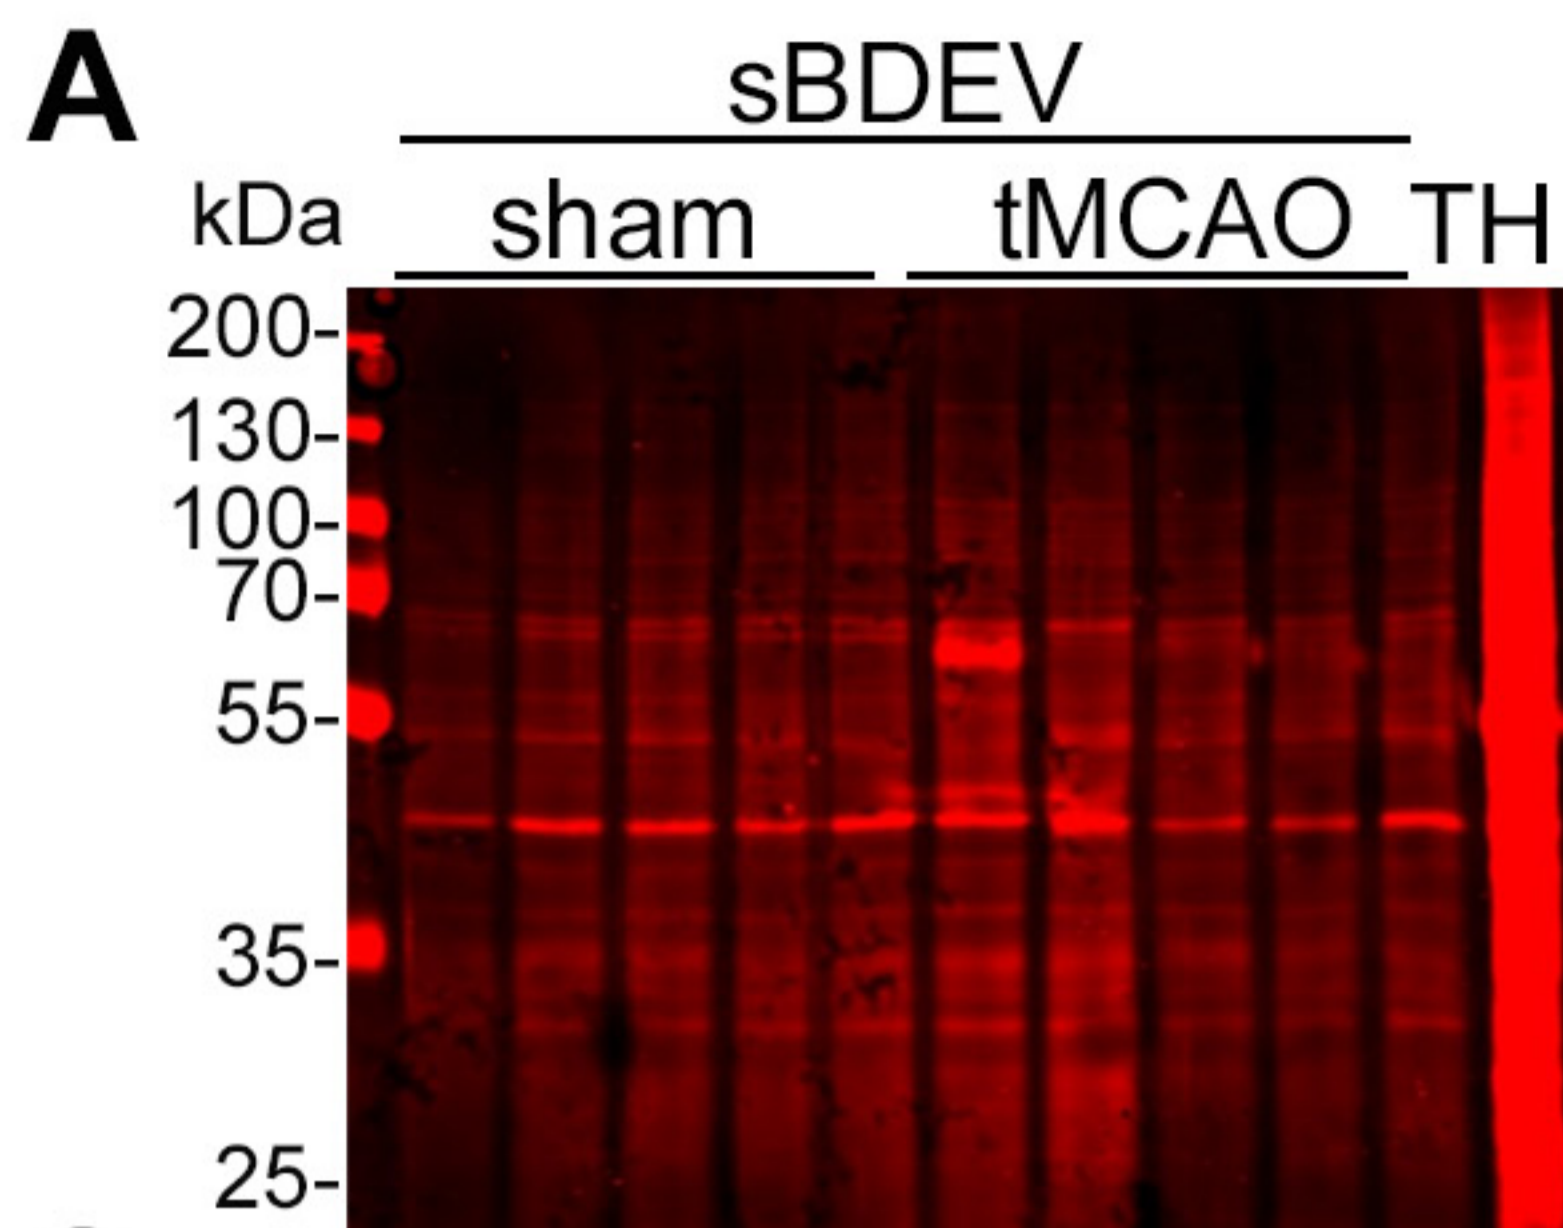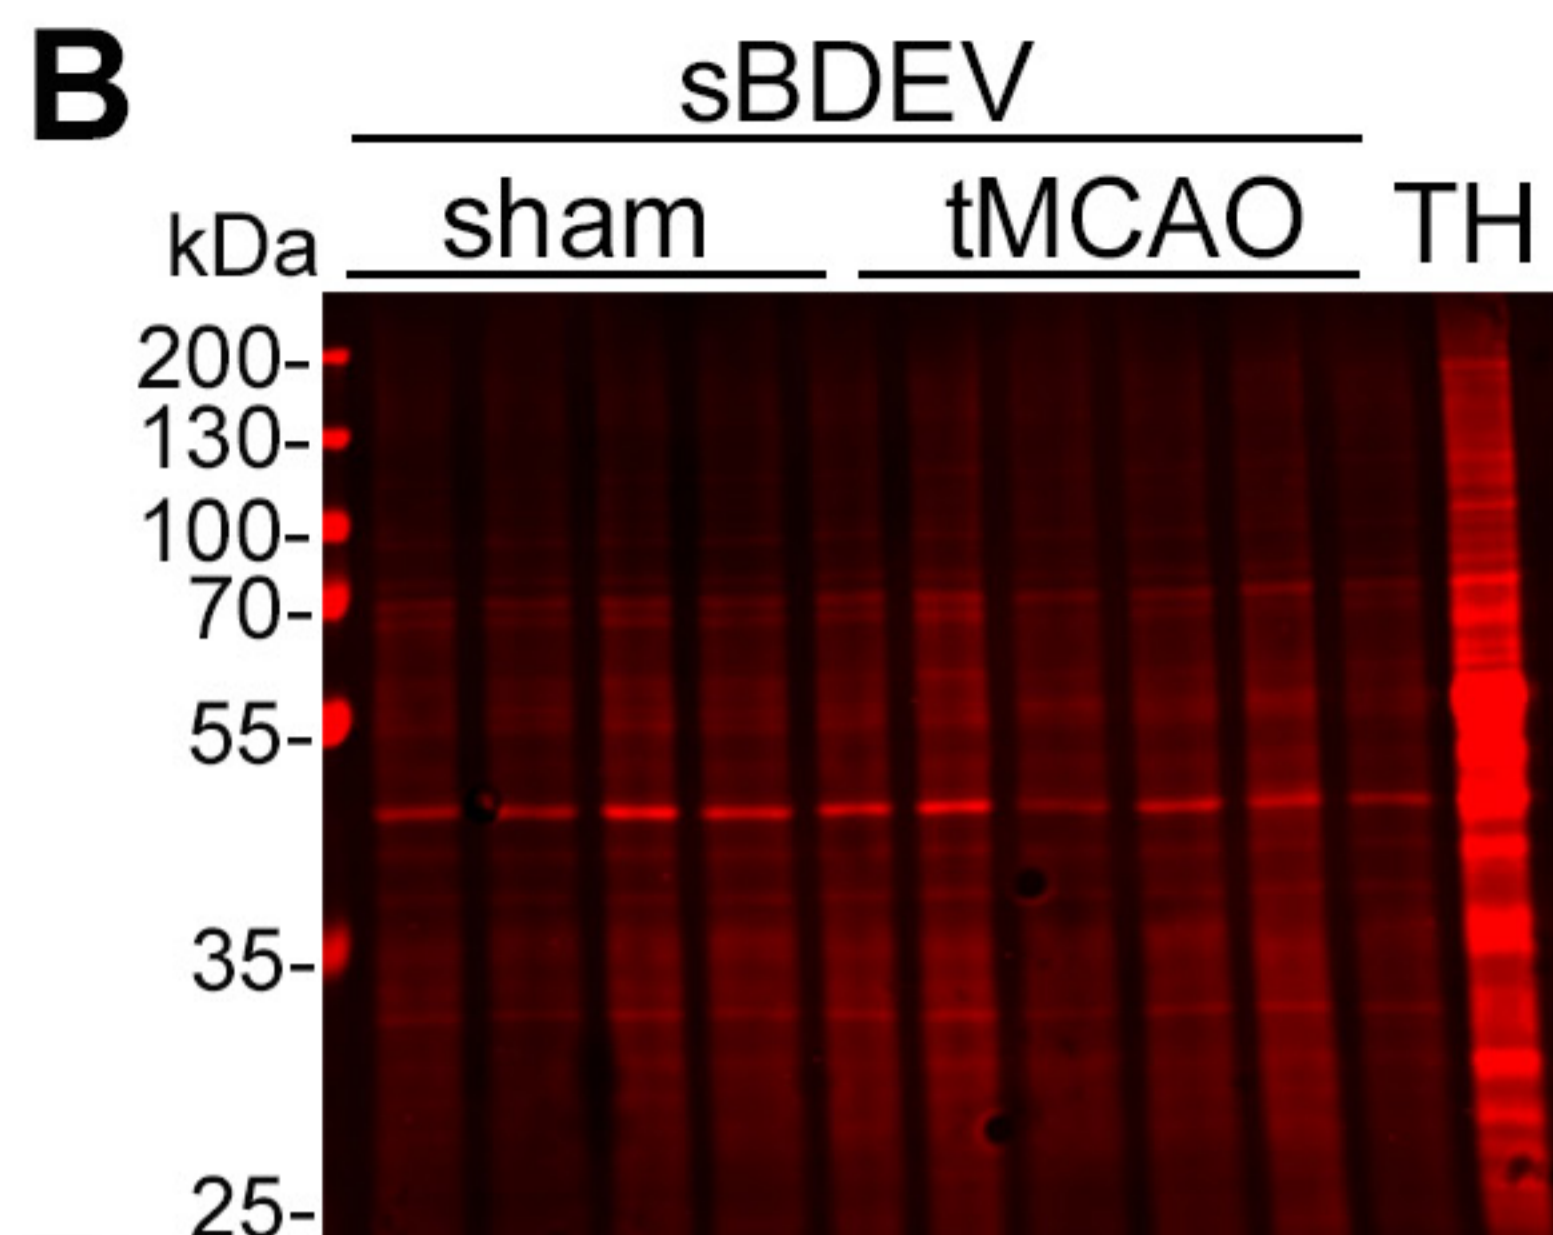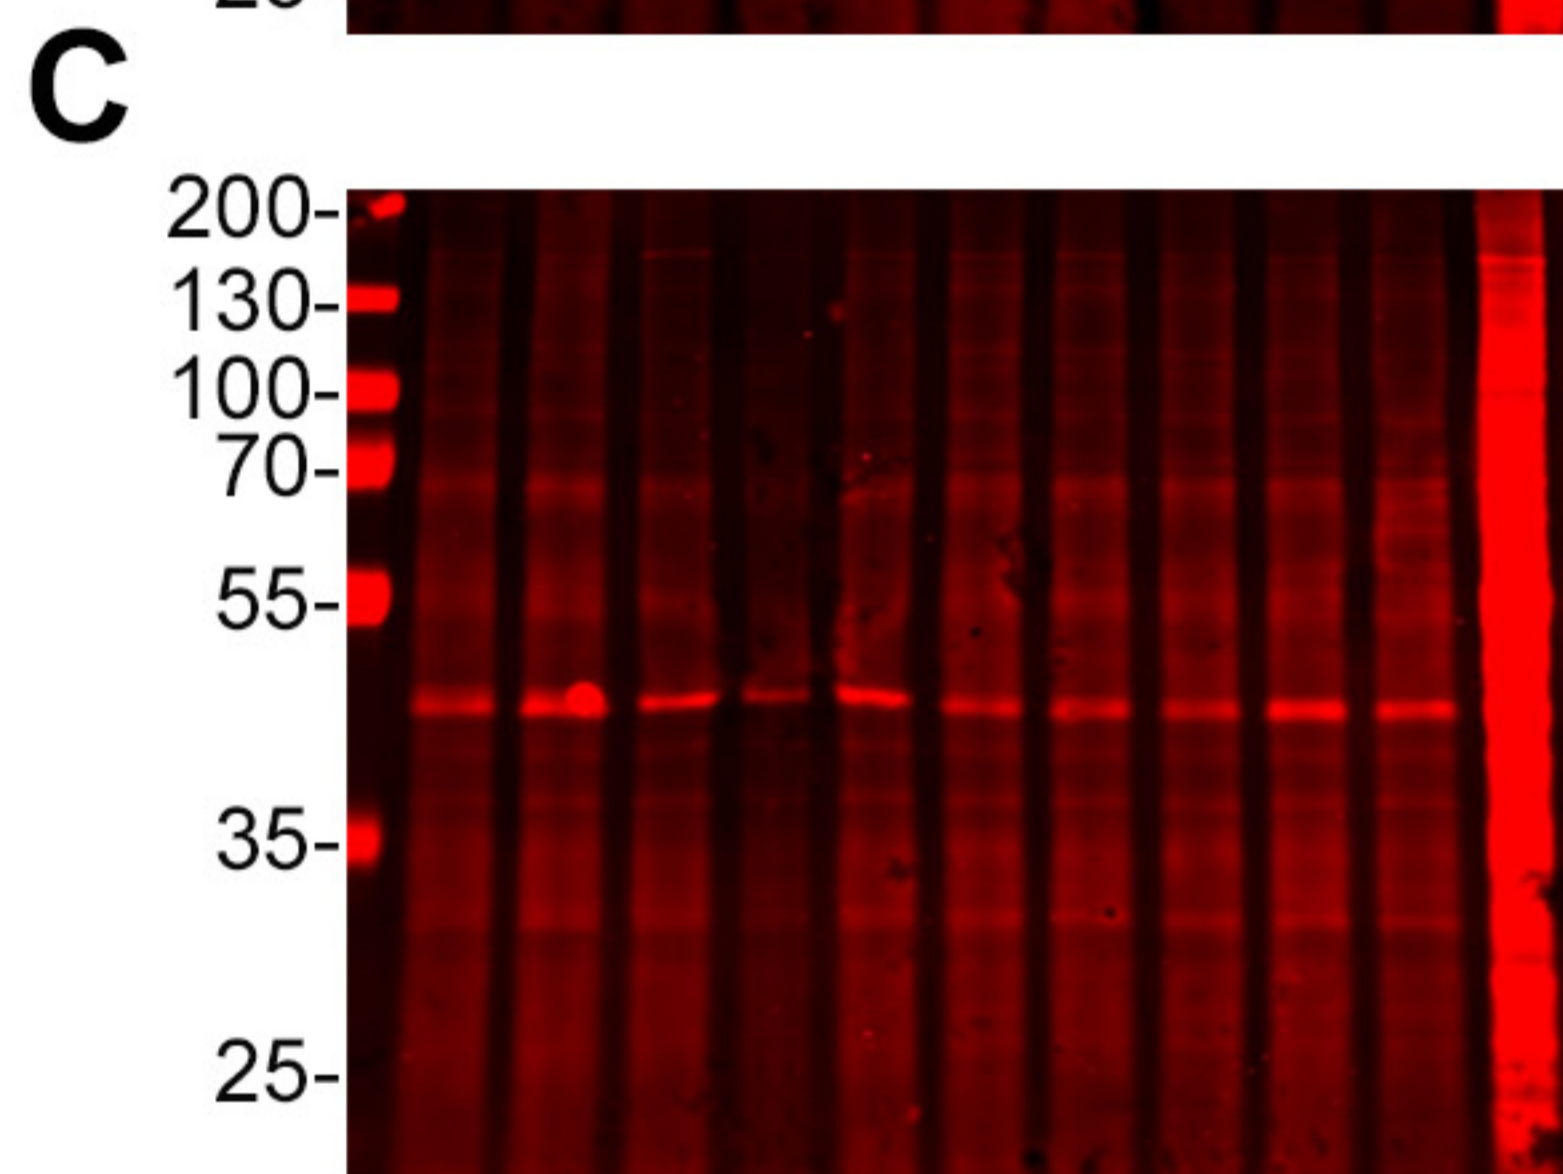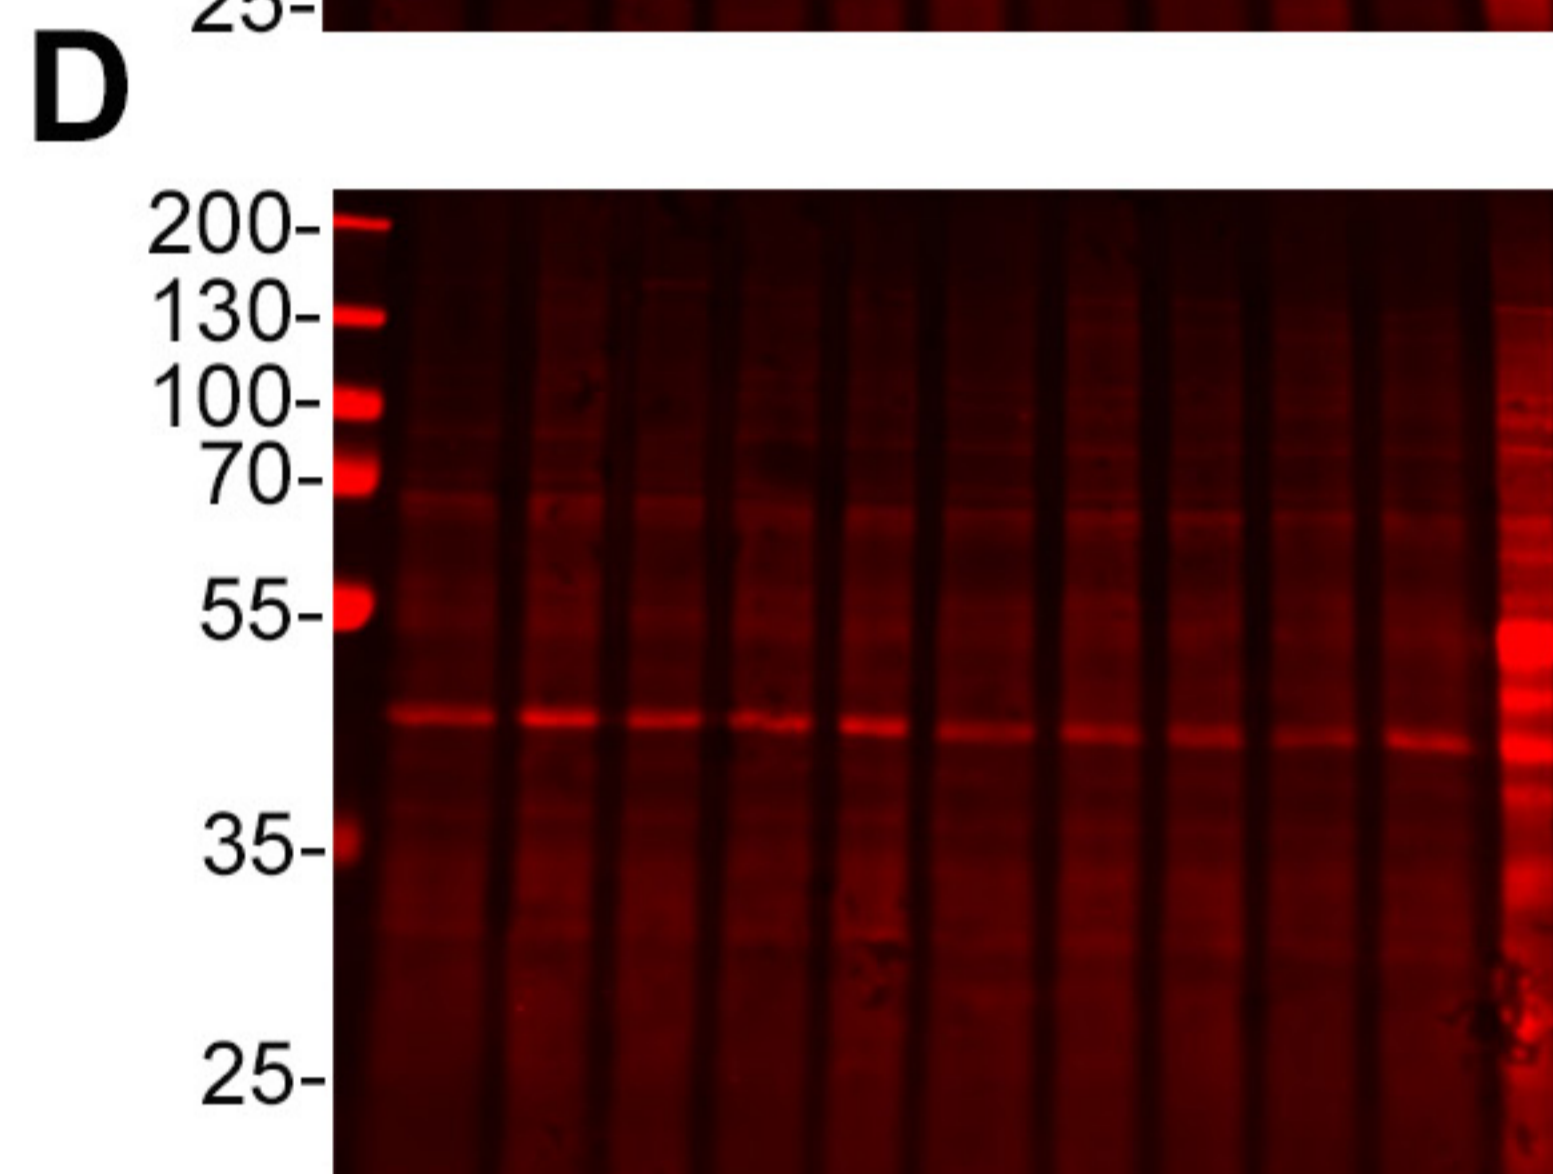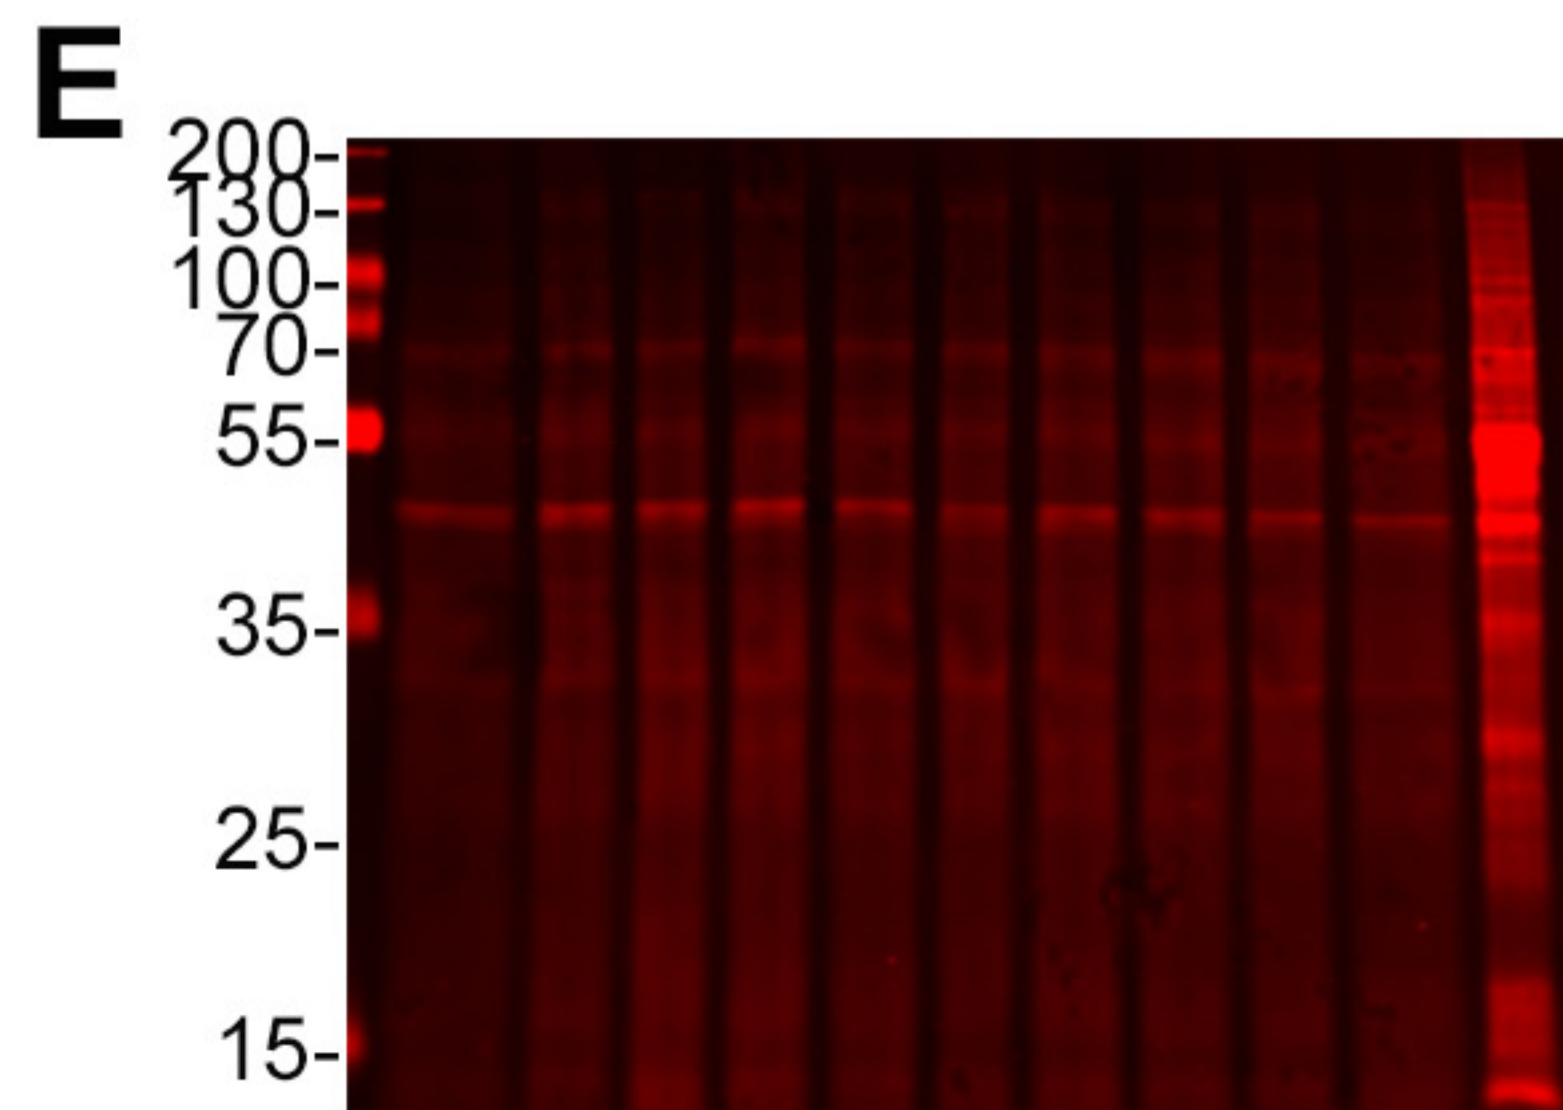

Supplement: 18_2022_4357_MOESM1_ESM.pdf [file 18_2022_4357_MOESM1_ESM.pdf]
